1 **A glimpse of the paleome in endolithic microbial communities**

2

3

4 Carl-Eric Wegner<sup>1</sup>, Raphaela Stahl<sup>2</sup>, Irina Velsko<sup>2</sup>, Alex Hübner<sup>2</sup>, Zandra Fagernäs<sup>2</sup>,  
5 Christina Warinner<sup>2,3</sup>, Robert Lehmann<sup>4</sup>, Thomas Ritschel<sup>4</sup>, Kai U. Totsche<sup>4</sup>, and  
6 Kirsten Küsel<sup>1,5,\*</sup>

7

8 <sup>1</sup>Institute of Biodiversity, Aquatic Geomicrobiology, Friedrich Schiller University,  
9 Dornburger Str. 159, 07743 Jena, Germany

10 <sup>2</sup>Department of Archaeogenetics, Max Planck Institute for Evolutionary Anthropology,  
11 Deutscher Platz 6, 04103 Leipzig, Germany

12 <sup>3</sup>Department of Anthropology, Harvard University, Cambridge, MA, USA

13 <sup>4</sup>Institute of Geosciences, Hydrogeology, Friedrich Schiller University Jena, Burgweg  
14 11, 07749 Jena, Germany

15 <sup>5</sup>German Center for Integrative Biodiversity Research (iDiv) Halle-Jena-Leipzig,  
16 Puschstraße 4, 04103 Leipzig, Germany

17

18

19

20 \*Corresponding author:

21 Kirsten Küsel

22 Email address: [kirsten.kuesel@uni-jena.de](mailto:kirsten.kuesel@uni-jena.de)

23

24 Running title: Metagenomics of endolithic microbial communities

25 Key words: subsurface, metagenomics, endolithic, DNA damage, chemolithotrophy

1

26 **Abstract**

27 The terrestrial subsurface houses a significant proportion of the Earth's microbial  
28 biomass. Our understanding about terrestrial subsurface microbiomes is almost  
29 exclusively derived from groundwater and porous sediments. To obtain more insights  
30 about endolithic microbiomes and their metabolic status, we investigated rock  
31 samples from the vadose zone, fractured aquifers, and deep aquitards. Using  
32 methods from paleogenomics, we recovered sufficient DNA for metagenomics from  
33 rock specimens independent of porosity, lithology, and depth. We estimated between  
34  $2.81$  and  $4.25 \times 10^5$  cells  $\times$  g<sup>-1</sup> rock. DNA damage patterns revealed paleome  
35 signatures (genetic records of past microbial communities) for three rock specimens  
36 from the vadose zone. The taxonomy and functional potential of paleome  
37 communities revealed increased abundances of chemolithoautotrophs, and a  
38 broader metabolic potential for aromatic hydrocarbon breakdown. Our study  
39 suggests that limestones represent ideal archives for genetic records of past  
40 microbial communities, due to their specific conditions facilitating long-term DNA  
41 preservation.

## 42 **Introduction**

43 The subsurface harbors a significant portion of the Earth's microbial biomass and  
44 contributes to global biogeochemical cycling [1–3]. The difficulty of access impairs  
45 estimating global subsurface biomass, activity, and biodiversity, especially in the  
46 continental biosphere. A comprehensive compilation of cell count measurements  
47 suggested that there are approximately  $2$  to  $6 \times 10^{29}$  cells in the continental  
48 subsurface [3]. Biomass estimates are exposed to significant uncertainties due to  
49 poorly understood parameters such as the ratio of surface-attached to pelagic  
50 groundwater cells, for which assumptions range between 1 and 10000. total organic  
51 carbon content and groundwater cellular abundances have been shown to be poor  
52 predictors for biomass and biodiversity [1–4].

53 Groundwater and other aqueous sample material are keys [4–8] for studying  
54 subsurface microbiomes, but only provide limited information regarding surface-  
55 attached or endolithic microbes inhabiting rock matrix pores. Microbial communities  
56 inhabiting the subsurface have been studied predominantly in porous,  
57 unconsolidated sediments, for example alluvial aquifer systems [9–12]. The bedrock  
58 itself has been rarely investigated [13–15]. Similarly, the vadose zone, the shallow  
59 unsaturated bedrock zone more connected to surface habitats [16, 17], has received  
60 little attention. Water saturation and nutrient supply, both controlled by relief position,  
61 rock properties (i.e. porosity, permeability, fracture network, composition), and  
62 groundwater quality and circulation patterns control subsurface microbial life [16, 18].  
63 The subsurface endolithic microbiome consists of subsurface specialists that prefer  
64 particular lithologies [19, 20], long-term descendants of organisms that colonized  
65 sediments during deposition [21], surface immigrants transported by fluid flow over  
66 geological time [21, 22], and invaders introduced as a result of human activities,

67 such as drilling or flooding. Continental subsurface habitats are viewed as energy-  
68 starved systems. They suffer from a lack of electron donors, electron acceptors,  
69 carbon, and nutrients [19], and are characterized by generation times in the range of  
70 thousands of years [23]. Ancient sedimentary carbon might represent a significant  
71 source of carbon for microorganisms in subsurface rock environments [24–26]. Part  
72 of these carbon compounds can be still metabolized, diffuse from aquitards into  
73 aquifers [27] and from less permeable into more permeable layers where they drive  
74 microbial activity [9, 11].

75 Because of the low amounts of microbial biomass and the challenge of recovering it,  
76 16S rRNA gene amplicon studies from rock core material have been the primary  
77 means of investigating microbial community composition. These surveys provide  
78 limited insights into the metabolic potential of organisms, and by default do not allow  
79 discrimination between living, potentially active, and dead cell material. Advances in  
80 paleomicrobiology, achieved through distinguishing “ancient” and “modern” DNA by  
81 high-throughput sequencing and DNA damage pattern analysis, are potential door  
82 openers for subsurface microbiology. Similar to hard tissue samples (bone, teeth,  
83 shells) [28–31], carbonate rocks contain calcium carbonates and calcium  
84 phosphates, which could adsorb or encase extracellular, “ancient” DNA by  
85 neutralizing negative charges present in the DNA backbone and the mineral surface  
86 by bivalent calcium cations [32]. We hypothesized that limestone/marlstone parent  
87 material would allow the recovery of metagenomic DNA (mgDNA), which could be  
88 sufficient to gain insights into the genomic potential of endolithic microbes.

89 In this study, we adapted methods from microbial archaeology and paleogenomics  
90 for mgDNA recovery, used comprehensive wet- and dry-lab control measures to  
91 minimize the risk of contamination, applied metagenomics, and analyzed DNA

92 damage patterns. The goal was to assess endolithic microbial biomass and use DNA  
93 damage as a proxy to distinguish DNA from intact and potentially alive cells from the  
94 paleome, the genetic remains of past microbial communities [30]. In addition, we  
95 aimed for decoding the taxonomic compositions and metabolic potentials of the  
96 endolithic microbiomes to understand how these communities are or were adapted  
97 to a life in consolidated rocks.

98

## 99 **Materials and Methods**

### 100 *Bedrock sampling and sample preparation*

101 We collected fractured bedrock from Upper Muschelkalk marine deposits (Germanic  
102 Triassic) in the groundwater recharge area of the Hainich low mountain range, as  
103 well as from isolated equivalents in the center of the Thuringian Syncline (both  
104 central Germany). Sampling was done during the construction of groundwater  
105 monitoring wells (Hainich CZE: 2011, 2014; samples: H13-17, H22-8, H22-30, KS36-  
106 H32, CM1-H32) and during the INFLUINS exploratory drilling (EF1/2012: 2013;  
107 samples: INF-MB2, INF-MB3). Measures to minimize contaminations included  
108 utilization of washed, de-rusted, steam-cleaned drill pipes, as well as ethanol-  
109 washed PVC liners in the Hainich CZE. Selected core segments of drill cores,  
110 recovered with rotary drill rigs (mud-rotary wireline), were immediately wrapped in  
111 sterile plastic bags, and transported on dry ice until storage in deep freezers (-80°C).  
112 Subsamples of bedrock matrices for DNA-extraction were prepared by fast hydraulic  
113 splitting of still frozen drill cores, under removal of the outer parts of the core  
114 segments. Subsamples for X-ray micro-computed tomography analysis (13 mm  
115 plugs, vertical orientation) were prepared with a drill press. Samples for carbon  
116 analysis were extracted from directly adjacent rock and also used for rock typing.

117

118 *Rock typing/characterization, pore classification and analysis of carbon fractions*

119 The rocks were classified based on stereoscope inspection, carbonate test (HCl  
120 10%), and analytical carbon measurements by applying the Dunham [33] and a  
121 mudrock classification scheme [34]. Porosity types and pore sizes were classified as  
122 described previously [35, 36]. Milieu indicators, including weathering colors and  
123 secondary pore mineralizations (Munsell colors), and derived oxicity rating were  
124 determined by stereoscope inspection, and also contrasted against characteristics of  
125 the core segment and borehole/well. The contents of total carbon and organic  
126 carbon (TOC) of the rock samples were determined on homogenized duplicate  
127 subsamples (~1.6 mg) of ~30 g ground rock using an elemental analyzer (Euro EA,  
128 HEKAtech, Wegberg, Germany). The OC was calculated as the difference from total  
129 carbon measurements released under combustion at 950°C and 600°C.

130

131 *X-ray micro-computed tomography (X-ray  $\mu$ CT)*

132 The three-dimensional structure of the plugs was assessed non-destructively by X-  
133 ray  $\mu$ CT (Xradia 620 Versa, Zeiss, Jena, Germany). Each plug was scanned in 1601  
134 projections to give a full 360° rotation at 0.4× magnification and an exposure time of  
135 two seconds per step using X-rays produced with 80 kV and 126  $\mu$ A. Tomographic  
136 reconstruction yielded a three-dimensional grayscale image with 1024<sup>3</sup> voxels at a  
137 resolution of 25.99  $\mu$ m with automated removal of ring artifacts and beam hardening.  
138 Images were cropped to remove boundaries, denoised with non-local means filtering  
139 [37] and binarized into pore space and solid by manual thresholding using Fiji  
140 (ImageJ v. 1.51) [38]. The pore sizes were calculated from binarized images using  
141 the maximum inscribed sphere algorithm implemented in the BoneJ plugin [39] in

142 Fiji. The volumetric pore size distribution was derived from the histogram of resulting  
143 images, while total X-ray  $\mu$ CT visible porosity was derived directly from the histogram  
144 of binarized images. Connected pore space of binarized images was assessed  
145 assuming 26-connectivity and visualized by randomly assigning a color to each set  
146 of voxels belonging to the same region.

147

#### 148 *Protocols for DNA extraction and sequencing library preparation*

149 We adapted protocols routinely used for ancient DNA preparation for downstream  
150 sequencing, which are all available from protocols.io  
151 (<https://dx.doi.org/10.17504/protocols.io.bvt9n6r6>). We reference the respective  
152 protocols in the following sections and describe them for the sake of completeness.  
153 The bench protocols available on protocols.io include detailed lists with respect to  
154 needed equipment and reagents, as well as necessary precautions.

155

#### 156 *DNA extraction*

157 DNA extraction from rock samples was performed by modifying a protocol originally  
158 designed for recovering ancient DNA from dental calculus  
159 (<https://dx.doi.org/10.17504/protocols.io.bidyka7w>). Metagenomic DNA was  
160 extracted from either 2.5 g of rock powder obtained using a dental drill or 2.5 g of  
161 rock pieces obtained by chipping rock material. To decalcify the samples, the rock  
162 material was rotated in EDTA (0.5 M, pH 8.0) for up to 10 days (rock pieces, rock  
163 powder 5 days) at 37 °C before being concentrated down to a volume of 1 mL using  
164 Amicon ® ultra centrifugal filtering units (MWCO 30 kDa and 10 kDa). Concentrated  
165 samples were mixed with 1 mL of extraction buffer (EDTA pH 8.0, 0.45 M;  
166 Proteinase K 0.025 mg/mL) and rotated overnight at 37°C. Samples were spun down

167 and subsequently mixed with 10 mL of binding buffer (guanidine hydrochloride, 4.77  
168 M; isopropanol, 40% [v/v]) and 400  $\mu$ L sodium acetate (3 M, pH 5.2). Samples were  
169 transferred to a high pure extender assembly from the High Pure Viral Nucleic Acid  
170 Large Volume kit (Roche, Mannheim, Germany) and centrifuged for 8 min with 1,500  
171 rpm at room temperature. The column from the high pure extender assembly was  
172 removed, placed in a new collection tube and dried by being centrifuged for 2 min  
173 with 14,000 rpm at room temperature. 450  $\mu$ L of wash buffer (High Pure Viral Nucleic  
174 Acid Large Volume kit) were added and samples were centrifuged for 1 min at 8,000  
175  $\times$  g at room temperature. This washing step was repeated once and columns were  
176 dried afterwards by centrifugation. DNA was eluted into a siliconized tube by adding  
177 50  $\mu$ L of TET (0.04% Tween 20 in 1  $\times$  Tris-EDTA [pH 8.0]), incubating samples for 3  
178 min at room temperature, and centrifugation for 1 min 14,000 rpm at room  
179 temperature. The elution step was repeated once and the pooled eluate was stored  
180 at -20  $^{\circ}$ C until further processed. All outlined steps were carried out in the ancient  
181 DNA lab of Max Planck Institute for the Science of Human History (MPI-SHH) to  
182 reduce the risk of contamination with modern environmental DNA. Blank extractions  
183 were carried out alongside the sample extractions, using identical steps, with the  
184 exception that water instead of rock material was used as input material. DNA  
185 concentrations were determined using a Qubit<sup>®</sup> fluorometer and the DNA high-  
186 sensitivity assay (ThermoFisher, Schwerte, Germany). Cell number estimates were  
187 calculated by dividing the amount of extracted DNA per gram rock material by the  
188 approximate mass of one prokaryotic genome, assuming a molecular weight per  
189 base pair of 618 Da (g/mol) [40] and a genome length of 3 Mbp.

190

191 *Library preparation*



192 Anticipating that extracted metagenomic DNA could contain both severely  
193 fragmented ancient DNA and high molecular weight modern DNA, we first used a  
194 Covaris M220 ultrasonicator to shear any high molecular weight DNA present to a  
195 maximum length of 500 bp prior to library construction. This ensured that all DNA  
196 present in the DNA extract would be suitable for library construction. We then used a  
197 library construction protocol (<https://dx.doi.org/10.17504/protocols.io.bakricv6>) that is  
198 specifically designed to be compatible with degraded and ultrashort DNA fragments  
199 [41]. Metagenomic DNA samples were blunt end repaired by mixing 10  $\mu$ L of DNA  
200 with 40  $\mu$ L of a mastermix containing NEB buffer no. 2 (1 $\times$ ), ATP 1 mM, BSA 0.8  
201 mg/mL, dNTPs 0.1 mM, T4 PNK 0.4 U, and T4 Polymerase 0.024 U. Samples were  
202 incubated for 20 min at 25  $^{\circ}$ C, followed by a 10 min incubation step at 12  $^{\circ}$ C. Blunt  
203 end repaired samples were subsequently purified using the MinElute Reaction  
204 Clean-up Kit (Qiagen, Hilden, Germany). Samples were finally eluted in 20  $\mu$ L of the  
205 elution buffer containing 0.05% Tween20. 18  $\mu$ L of eluted samples were mixed with  
206 21  $\mu$ L of a mastermix containing Quick Ligase buffer (final concentration 1  $\times$ ) and a  
207 mix of adapters (0.25  $\mu$ M). Next, 1  $\mu$ L of Quick Ligase (5 U) was added and libraries  
208 were incubated at 22  $^{\circ}$ C for 20 min. Reactions were again purified using the  
209 MinElute Reaction Clean-up Kit. Samples were eluted using 22  $\mu$ L elution buffer. The  
210 adapter fill-in reaction was performed in a final volume of 40  $\mu$ L. The reaction mix  
211 consisted of a 20  $\mu$ L eluate and a 20  $\mu$ L mastermix containing isothermal buffer (final  
212 concentration 1  $\times$ ), dNTPs (0.125 mM each), and Bst polymerase (0.4 U). Reactions  
213 were incubated for 30 min at 37  $^{\circ}$ C, before being incubated at 80  $^{\circ}$ C for additional 10  
214 min to inactivate the polymerase. Before being further processed, libraries were  
215 quality-checked by quantitative PCR (qPCR). Dilutions of the libraries (1:10) were  
216 mixed (1  $\mu$ L template), with 19  $\mu$ L of a mixture containing DyNAmo mastermix (final

217 concentration 1 ×) and IS7 and IS8 primers (1 μM). The thermal profile was 10 min  
218 at 95°C, 40 cycles of 30 s at 95°C, 1 min at 60°C, 30 s at 72°C, followed by a melting  
219 curve (60-95°C). Libraries were subsequently indexed  
220 (<https://dx.doi.org/10.17504/protocols.io.bvt8n6rw>) and amplified  
221 (<https://dx.doi.org/10.17504/protocols.io.beqkjduw>) as outlined in the referenced  
222 protocols. Libraries were equimolarly pooled and sequenced on an Illumina NextSeq  
223 500 instrument in paired-end mode (2 × 150 bp) using v. 2.5 chemistry. The  
224 sequencing depth ranged between 2.24 and 4.81 Gbp (**Table S1**). All outlined steps  
225 were carried out in the ancient and modern DNA clean rooms of the MPI-SHH to  
226 reduce the possibility of contamination. Library blanks were prepared alongside the  
227 sample extractions, using identical steps, with the exception that water instead of  
228 rock material eluate was used as input material.

229

### 230 *Sequence data pre-processing*

231 Quality parameters of raw sequencing data were assessed using *FastQC* (v. 0.11.8)  
232 [42]. Adapter and quality trimming was done with *bbduk* (v. 38.22) [43] (settings:  
233 qtrim=rl trimq=20 ktrim=r k=25 mink=11) using its included set of common sequence  
234 contaminants and adapters. Trimmed sequences were subsequently subjected to  
235 taxonomic profiling and metagenome assembly and binning.

236

### 237 *Taxonomic profiling*

238 Trimmed sequences were taxonomically profiled using *kaiju* (v. 1.7.3) [44] and  
239 *diamond* (v. 2.0.7.145) [45, 46]. *Diamond* was used for the taxonomic assignment of  
240 trimmed, and paired-end assembled (with *vsearch* (v2.14.1) [47]) sequences, while  
241 *kaiju* was used for the taxonomic assignment of assembled contigs. For *kaiju*,

242 sequences were translated into open reading frames, which were used for string  
243 matching with the implemented backward-search algorithm based on the one that is  
244 part of the Burrows-Wheeler transform [48, 49]. *Kaiju* was run in greedy mode with  
245 up to 5 allowed mismatches (-a greedy -e 5). *Diamond* searches were done in  
246 sensitive mode applying an E-value threshold of 0.0001 (-e 0.00001 -c 1 --sensitive).  
247 Database hits were annotated making use of the LCA algorithm implemented in  
248 *megan* (v. 6.21.1) [50, 51] with default settings. NCBI nr [52] was used as the  
249 reference database for taxonomic profiling (*kaiju*, nr\_euk release 2020-05; *diamond*,  
250 custom built database based on NCBI nr retrieved from NCBI in 2020-03). Taxa  
251 representing contaminants on different taxonomic levels were identified using  
252 taxonomic profiles obtained from *diamond* and *decontam* (v. 1.1.1) [53] based on  
253 prevalence and frequency in true samples and extraction and library blanks.

254

#### 255 *Metagenome assembly and binning*

256 Metagenome coverage was estimated based on k-mer redundancy using *nonpareil*  
257 (v. 3.303) (-T kmer) [54, 55]. Trimmed sequences were assembled into contigs with  
258 *megahit* (v. 1.2.9) (default settings) [56] and *metaSPADES* (v. 3.13.0) (--only-  
259 assembler) [57, 58]. Due to better performance we used the megahit assemblies for  
260 all subsequent steps. Contigs longer than 1 kb were kept and quality-controlled  
261 sequences were mapped onto these contigs using *bowtie2* (v. 2.3.4.1) [59] (--no-  
262 unal). Resulting .sam files were converted into .bam files and indexed with *samtools*  
263 (v. 1.7) [60]. Contigs and indexed mapping files were used for manual metagenomic  
264 binning using *anvio* (v. 6.2) [61] based on sequence composition and differential  
265 abundance. The completeness, redundancy, and heterogeneity of bins was

266 assessed with *checkm* (v. 1.1.2) [62]. Bins were taxonomically assigned using *gtdb-*  
267 *tk* (v. 0.3.2) [63].

268

#### 269 *Functional annotation*

270 Functional profiling of trimmed sequences was done with *humann* (v. 3.0) [64] using  
271 precompiled Uniref50 and Uniref90 protein databases (release 2019-01) and  
272 applying default settings. The resulting gene families table was regrouped to KEGG  
273 orthologies, normalized to copies per million (CoPM), and summarized with respect  
274 to pathways and functions of interest.

275

#### 276 *DNA damage pattern analysis*

277 Using assembled contigs and the output from mapping trimmed sequences back  
278 onto the contigs, DNA damage patterns were identified and analysed using  
279 *mapdamage* (v. 2.2.1) [65, 66] and *pydamage* (v. 0.50alpha) [67]. The output from  
280 *mapdamage* was ultimately used as it provides metrics with respect to all possible  
281 DNA damage-related substitutions. DNA damage pattern analysis was also done for  
282 selected subsets of the assembled contigs based on taxonomy (assigned with *kaiju*).

283

#### 284 *Figure generation*

285 Figures were prepared using the R packages *ggplot2* (part of *tidyverse*) (v. 1.3.1)  
286 [71] and *ggpubr* (v. 0.4.0) (<https://rpkgs.datanovia.com/ggpubr/index.html>) and  
287 finalized with *inkscape* (<https://inkscape.org/>).

288

#### 289 *Data availability*

290 Sequence data were deposited at the European Nucleotide Archive under BioProject  
291 number PRJEB52959.

292

## 293 **Results**

### 294 *General sample characteristics and porosity analysis*

295 We analyzed five bedrock samples from the vadose zone of a low-mountain range  
296 groundwater recharge area (Hainich Critical Zone Exploratory (CZE)) from depths  
297 between 9-33 meters below ground level (mbgl), and two samples from deep  
298 isolated aquitards with similar stratigraphic position and lithology (INFLUINS deep  
299 drilling) from depths 285 and 296 mbgl. The rock samples, representing the thin-  
300 bedded marine alternations of mixed carbonate-siliciclastic rock that form widely-  
301 distributed fractured-rock aquifers, range from argillaceous marlstones to bioclastic  
302 limestones with a broad range of porosity (**Table 1**). Three samples showed pores  
303 bigger than 0.02 mm (**Figure S1**) with volumetric fractions of 0.9% (INF-MB3), 2.4%  
304 (H22-30), or 8.9% (H13-17). INF-MB3 (**Figure S2**) showed a distribution of pores  
305 within 0.02-0.28 mm, which appeared at homogeneously distributed, but  
306 disconnected locations. The pore space in H22-30 (**Figure S3**) also shows several  
307 disconnected pores, but includes fractures and carbonate dissolution features that  
308 span large parts of the entire sample. The pore size distribution is slightly higher in  
309 the range of 0.02-0.52 mm. With pores in the size of 0.02-1.58 mm, H13-17 featured  
310 large macropores (**Figure 1**) from intensive carbonate dissolution that connect most  
311 of the internal pore space. H22-8 consisted of dense rock and showed only a single  
312 fracture in a size near the  $\mu$ CT limit of detection (**Figure 1**) that impeded a  
313 meaningful quantification. The other three rock samples did not show any pores  
314 above 0.02 mm, reflecting very dense rock matrices (**Figures S4-S6**). The

315 macroscopic inspection revealed the presence of secondary Fe-minerals in large  
316 dissolution pores in two limestone specimens, also representing connected matrix  
317 habitats in the main aquifer (Trochitenkalk formation) (**Figure 1A + E, Table 1**). The  
318 total carbon content ranged between  $5.53 \pm 0.18$  (H22-8) and  $12.39 \pm 0.17\%$  (H32-  
319 KS36). The organic carbon content was, with the exception of CM1-H32 ( $8.17 \pm$   
320  $1.49\%$ ), below 3%.

321

### 322 *Recovery of metagenomic DNA (mgDNA) independent from the specimen*

323 We were able to extract mgDNA from all rock specimens. DNA extractions yielded  
324 higher amounts from rock pieces than from ground rock powder (**Figure 2A**) with  
325 concentrations ranging between 0.011 and  $0.051 \text{ ng} \times \mu\text{L}^{-1}$  ( $0.033 \pm 0.013 \text{ ng} \times \mu\text{L}^{-1}$ )  
326 for pieces and  $0.019 \pm 0.005 \text{ ng} \times \mu\text{L}^{-1}$  from powder. The latter was in the range of  
327 the extraction blanks ( $0.017 \pm 0.007 \text{ ng} \times \mu\text{L}^{-1}$ ). The quantitation of prepared  
328 sequencing libraries by quantitative PCR yielded results in line with the results from  
329 DNA extraction (**Figure 2A**).

330 Based on the amount of extracted DNA from the processed samples, we crudely  
331 estimated the number of cells potentially present in the rock material. Taking into  
332 account the molecular weight of one base pair and using a length of three million  
333 base pairs as proxy for a prokaryotic genome, we estimated between 2.81 and 4.25  
334  $\times 10^5 \text{ cells} \times \text{g}^{-1}$  processed rock material.

335

### 336 *Taxonomic profiling*

337 Sequence data pre-processing (**Table S1, Figure S7**) indicated that the length  
338 distribution was generally skewed towards shorter lengths (**Figure 2B**).  
339 Consequently, the proportion of taxonomically assigned reads was rather low and

340 varied between 6.2 and 18.6% (**Figure 2C, Table S1**). k-mer based redundancy  
341 analysis (**Figure S8**) suggested that our data covered more than 90% of the  
342 anticipated diversity based on recovered mgDNA. Decontamination analysis  
343 identified in total 31 contaminants, one on phylum-level (Spirochaetes), two on class-  
344 level (Epsilonproteobacteria, Chlamydia), 9 on family- and 19 on genus-level (**Table**  
345 **S2**). Principal component analysis on phylum level (**Figure 3A**) showed that H22-8,  
346 H22-30, and KS36-H32 were separated from blank data sets, independent from  
347 decontamination. The remaining four data sets were grouped together with some of  
348 the library and extraction blanks, independent of sample type. Decontamination  
349 made data sets more distinguishable from blanks, which was for instance evident in  
350 the case of CM1-H32 and H13-17. On family level (**Figure 3B**), decontaminated data  
351 sets could be clearly distinguished from blanks. For the subsequent taxonomic  
352 profiling pieces and powder data sets have been pooled.

353 Taxonomic profiles were characterized by inverse abundance patterns that divided  
354 the data sets into two groups. Group (1) included H22-8, H22-30, and KS36-H32;  
355 group (2) H13-17, CM1-H32, INF-MB2, and INF-MB3. Acidobacteria (3.93-11.48%),  
356 *Cand. Rokubacteria* (8.28-17.09%), Chloroflexi (4.07-14.74%), Cyanobacteria (0.56-  
357 2.71%), NC10 (1.49-4.18%), Nitrospirae (1.33-3.01%), and Thaumarchaeota (0.69-  
358 2.75%) (**Figure 3C, Table S3**) featured increased abundances in group (1). In  
359 comparison, the relative abundances of for instance Firmicutes (up to 15.34%),  
360 *Cand. Saccharibacteria* (2.68-9.08%), and Bacteroidetes (15.01-20.08%) were  
361 higher in group (2). Some of the mentioned taxa were also detected in the blanks.  
362 Bacteroidetes reached abundances up to 36%, while *Cand. Saccharibacteria* were  
363 only detected in one blank (4.7%). The relative abundances of Acidobacteria and  
364 Chloroflexi did not exceed 2 and 1.5%, respectively. Cyanobacteria abundances

365 were comparable between data sets and blanks. Nitrospirae were only found in two  
366 blanks and the abundances were below 0.5% (**Table S3**). Proteobacteria were highly  
367 abundant in all data sets (up to 70.81%), and partially much more abundant in the  
368 blanks (up to 85.3%).

369 Decontamination did not lead to major changes in the taxonomic profiles (**Figure**  
370 **3C**). Lesser abundant phyla increased in relative abundance. Examples include  
371 *Cand. Eisenbacteria* (KS36-H32), *Cand. Jorgensenbacteria* (H22-30), *Cand.*  
372 *Levybacteria* (H22-8), and *Cand. Omnitrophica* (KS36-H32, H22-8). Taxonomic  
373 profiles at deeper levels are not described as the assignment rate dropped beyond  
374 phylum-level.

375

#### 376 *Metagenome assembly and DNA damage pattern analysis*

377 For DNA damage pattern analysis, we co-assembled data sets from rock pieces and  
378 rock powder from all sites. We compared two different assemblers, *megahit* [56] and  
379 *metaSPADES* [58], and ultimately settled on the *megahit* assembly. The assemblies  
380 obtained from *metaSPADES* featured larger total assembly lengths, but N50 values  
381 and maximum contig lengths were significantly larger when using *megahit* (**Figure**  
382 **S9**). From none of the assemblies, we obtained more than 3153 contigs longer than  
383 1 kbp (1.07-3.15 contigs,  $1.81 \pm 0.78$  [mean  $\pm$  SD]). The N50 values and the  
384 maximum lengths of these contig subsets were rather low,  $1.69 \pm 0.16$  and  $16.79 \pm$   
385  $5.43$  kbp, respectively. The proportion of recruited reads (after quality control) to the  
386 individual assemblies ranged between 6.8 and 23.8% (average 17%), which  
387 indicated that our assemblies are only representative for a small part of the  
388 generated sequencing data (**Table S4**). We used the mapping files from read  
389 recruitment analysis to determine mgDNA fragment lengths (**Figure S10**), which



390 showed that fragment sizes were, with the exception of H22-30, shorter for group (1)  
391 samples.

392 From a taxonomic perspective, the assembled contigs were skewed towards few  
393 taxa that assembled well. Contigs from group (2) data sets are dominated by  
394 Actinobacteria and Proteobacteria, with combined relative abundances above 95%  
395 (**Table S5**). The contigs from group (1) data sets were taxonomically more diverse,  
396 but also dominated by Actinobacteria and Proteobacteria, with combined relative  
397 abundances of 76% or more. Taxa that were highly abundant based on profiling  
398 quality-controlled sequences, were underrepresented. For instance, no more than  
399 0.8% of the assembled contigs were affiliated with *Cand. Rokubacteria* (H22-30) and  
400 we only obtained contigs from this taxon from group (1) data sets (**Table S5**).

401 Mapping metagenomic sequence reads onto assembled contigs larger than 1 kb  
402 revealed a pronounced deamination signal in the case of group (1) samples. We  
403 detected substitution frequencies partially above 20% (**Figure 4**). Cytosine to  
404 thymine substitutions (5pCtoT) and guanine to adenine substitutions (3pGtoA) were  
405 comparable for group (1) data sets. Substitution frequencies were negligible for the  
406 remaining data sets. The average coverage of the contigs considered for damage  
407 analysis was between 65 and 130×, but substantially lower for extraction and library  
408 blanks, 24 and 35×, respectively. Extraction and library blanks indicated in  
409 comparison to group (1) data sets weak damage signals, with discrepancies  
410 between 5pCtoT and 3pGtoA frequencies. The library blanks featured over the first  
411 five positions up to 4.2% 3pGtoA, while 5pCtoT did not exceed 1.7% (**Figure 4**). We  
412 subsampled contigs affiliated with *Cand. Rokubacteria* and detected substitution  
413 frequencies between 24 and 32% (**Figure S11**).

414

#### 415 *Metagenome binning*

416 Metagenome binning led to the reconstruction of 12 bins with a completeness of at  
417 least 20% (**Table S6**), five of the reconstructed bins were more than 50% complete.  
418 The redundancy of the reconstructed bins was generally low and did not exceed  
419 3.95%, while the heterogeneity reached values of up to 100% (**Table S6**). Nine bins  
420 were assigned to *Actinomyces*. Two of the bins belonged to the Acidiferrobacterales  
421 (one Sulfurifustaceae [H228\_bin5], one Acidiferrobacteraceae [KS36MB2\_bin3]).  
422 One bin was assigned to UBA9968 (**Table S6**). All of the bins were highly  
423 fragmented (no. of contigs > 390), and N50 values did not exceed 4 kbp. In most  
424 cases, N50 values were below 2 kbp. The relative abundance of Acidiferrobacterales  
425 based on profiling quality-controlled sequences did not exceed 0.28%. They were  
426 only detected in H22-8 and KS36-H32. We wanted to compare the two  
427 Acidiferrobacterales bins to bins recovered from the Hainich CZE groundwater [72],  
428 where this taxon is thought to be involved in sulfur cycling [73], but phylogenomic  
429 and ANI (average nucleotide identity)-based comparisons were impossible for the  
430 lack of a shared set of single copy marker genes and the high degree of  
431 fragmentation.

432

#### 433 *Functional profiling*

434 Taking into account that our assemblies recruited only small proportions of the  
435 quality-controlled sequences, we used the latter for functional profiling using *humann*  
436 [64]. Between 57.3 (INF-MB2) and 85.5% (KS36-H32) (**Figure 5**, “UNMAPPED”) of  
437 the sequences did not yield database hits. We regrouped the output from *humann*  
438 into KEGG orthologies and summarized the normalized data (copies per million,  
439 CoPM) for KEGG pathways (**Table S7**) based on the sequences with database hits.

440 We subsequently focused on pathways that differed between group (1) and group (2)  
441 data sets (**Table S8**), in particular functions in the context of carbon fixation,  
442 chemolithotrophy, anaerobic respiration, and aromatic hydrocarbon breakdown  
443 (**Figure 5**).

444 Calvin cycle related sequences were only detected for group (1) data sets (H22-8,  
445 KS36-H32) that showed pronounced DNA damage. The corresponding logCoPM  
446 values were 5.35 and 5.51, respectively. Similarly, evidence for the  
447 chemolithotrophic oxidation of sulfur and ammonia was only found in that group, with  
448 the exception of H13-17 from group (2). Evidence for nitrification was only found in  
449 H22-8. Sequences linked to the reductive TCA cycle were found in all data sets.

450 Sequences related to aromatic hydrocarbon breakdown were detected in all data  
451 sets, with group (1) data sets showing a broader metabolic potential to utilize these  
452 substrates, in particular H22-8 (**Table S7 + Table S8**). Matched sequences were  
453 affiliated with the breakdown of diverse compound classes, including among others  
454 toluene and polycyclic aromatic hydrocarbons (PAH) (**Figure 5**). Group (2) data sets  
455 featured comparable narrow metabolic capabilities, including the potential for the  
456 breakdown of benzoate and related compounds (**Table S7**).

457

## 458 **Discussion**

459 We were able to recover sufficient mgDNA from all seven rock specimens for  
460 metagenomic analysis of endolithic microbial communities using protocols adapted  
461 from paleogenomics. The amounts of recovered DNA were extremely small.  
462 Extractions from rock pieces were more efficient than from powdered samples. The  
463 heat released during powdering may have led to a reduced DNA yield. Estimated cell  
464 numbers were within a narrow range of 2.81 and  $4.25 \times 10^5$  cells  $\times$  g<sup>-1</sup> rock,

465 independent from sampling depth and rock characteristics. The subsurface cell count  
466 database assembled by Magnabosco and colleagues [3] includes 3787 analyses, of  
467 which 2439 were linked to core samples. The database does not include cell counts  
468 from limestone, but from rock material classified as carbonate from Lake Van [74]  
469 from depths between 0 and 100 mbfs (meters below land surface). Our estimated  
470 cell numbers lie within the reported broad range ( $1.27 \times 10^3 - 4.18 \times 10^7 \times g^{-1}$  lake  
471 core material). Filling this existing gap is important, given the relevance of carbonate  
472 aquifers for global drinking water supply [75]. The majority of the data assembled by  
473 Magnabosco and colleagues [3] were based on microscopic counts derived from  
474 surface fracture samples after desorbing cells, which might reflect the endolithic  
475 community. For obtaining microscopic counts, fluorescent stains like acridine orange  
476 or DAPI (4',6-diamidino-2-phenylindole) are commonly used, which cannot  
477 distinguish between dead cells and those with an intact membrane, which are  
478 presumably alive. The other fraction of the cell counts was based on qPCR targeting  
479 the 16S rRNA gene [3], which is by default also not suited to differentiate between  
480 dead and live cells or extracellular DNA. A differentiation between past and  
481 potentially alive and active subsurface microbiome members provides relevant  
482 information that helps to assess the quality and potential risks associated with  
483 groundwater resources. The provision of clean drinking water is considered to be the  
484 most important ecosystem service that the subsurface provides to us humans. This  
485 service is very vulnerable to anthropogenic and climatic impacts [76].

486 DNA damage pattern analysis is commonly used in the context of paleogenomics for  
487 distinguishing “modern” from degraded “ancient” DNA, which is crucial when  
488 studying prehistoric populations of humans, plants, animals, or (pathogenic)  
489 microbes [77, 78]. Determined DNA fragment sizes, DNA damage pattern analysis,

490 as well as taxonomic and functional profiling, set apart the group (1) samples. The  
491 pronounced damage patterns indicate that DNA obtained from H22-8, H22-30, and  
492 KS36-H32 had undergone chemical degradation, which occurs postmortem. The  
493 most common forms of DNA damage are depurination, strand breakage, and  
494 cytosine deamination on single-stranded overhangs, which occur in sequence during  
495 DNA decay [79, 80]. Cytosine deamination occurs at the end of DNA fragments and  
496 can be identified by determining the frequency of 5' cytosine to thymine transitions  
497 (3' guanine to adenine transitions on the reverse complement strand) by mapping  
498 metagenomic sequence reads onto metagenome assemblies [66]. We detected  
499 substitution frequencies partially above 20%, which is expected for highly degraded  
500 DNA from dead organisms [67, 78]. Although, we cannot rule out that all these  
501 microbes were already dead when transported into rock matrix pores, it is more likely  
502 that they died after being disconnected from energy and water fluxes.

503 Environmental conditions such as low temperature, high ionic strength, pH, and  
504 protection by adsorption can delay the decay of DNA [81–83]. The different forms of  
505 crystalline carbonates present in the thin-bedded, alternating mixed  
506 carbonate-/siliciclastic bedrock of the Hainich CZE and the INFLUINS site might  
507 have favored DNA preservation through neutralizing negative charges, similar to the  
508 situation in hard tissue samples (bone, teeth, shells) [28–32]. We propose to  
509 consider the genetic records from these three samples as rock paleome signatures,  
510 signatures of past microbial communities [84].

511 Different from sample materials commonly studied for paleogenomics, such as  
512 dental calculus, bones, and shells; microbial communities in the subsurface are not  
513 necessarily isolated due to being encased by a mineral matrix. Consequently,  
514 microbiome signatures could originate from both, ancient and modern DNA, which

515 affects substitution rates and DNA damage patterns. The subsurface has to be  
516 considered as an open system, a giant biogeoreactor with constant or intermittent  
517 connection to fluid flow and matter transport, including living microbes [85]. The DNA  
518 substitution rates detected for group (1) data sets stress the dominance of decayed  
519 DNA in these rock specimens, likely caused by temporary or spatial isolation.

520 We could not date the DNA due to the tiny amounts recovered. DNA in geological  
521 records is in most cases not preserved for more than  $10^5$  years [86–90], and  $10^6$   
522 years is considered the maximum period over which DNA survival is sufficient for  
523 recovery and analysis [91]. The detected paleome signatures cannot reflect the  
524 metabolic potentials of microbes colonizing sediments about 240 million years ago,  
525 when the Upper Muschelkalk and Lower Keuper (lithostratigraphic subgroups of the  
526 Middle Triassic) were formed [92]. Our paleome signatures cannot be considered as  
527 biosignatures from ancient microbial life over geological time periods, as those  
528 identified in calcite and pyrite veins across the Precambrian Fennoscandian shield  
529 by isotopic and molecular analyses [93]. Rather carbonate bedrocks represent DNA  
530 archives that can be used to learn more about the near biological past. We argue  
531 that distinguishing paleome from non-paleome signatures is a useful approach to  
532 identify more recent communities and their functions from those that did contribute to  
533 subsurface functioning in the past.

534 We are confident that the H22-8, H22-30, KS36-H32 data sets are robust. Their  
535 taxonomic profiles differed from the laboratory blanks, and they exhibited high DNA  
536 fragmentation and higher levels of cytosine deamination than laboratory blanks,  
537 indicating that the DNA from group (1) samples disproportionately derives from dead  
538 organisms. The remaining “modern” group (2) samples did not feature any  
539 pronounced DNA damage and likely originate from alive or recently living organisms.

540 The paleome signatures of the group (1) samples were all obtained from vadose  
541 zone habitats in the low-mountain groundwater recharge area [17]. These shallow  
542 bedrock habitats are characterized by spatially and temporally limited water and  
543 nutrient supply via seepage from the surface, which can lead to more pronounced  
544 starvation especially in disconnected pores compared to saturated habitats. The  
545 “modern” signatures of group (2), except H13-17, were obtained from the  
546 permanently water-saturated phreatic zone of a fractured aquifer (Hainich CZE) and  
547 from ~300 m deep aquitard samples (INFLUINS deep drilling) with similar matrix  
548 permeabilities, but without fracture networks [17]. The resulting isolation from the  
549 surface did not appear to be critical to the potential survival of endolithic  
550 microorganisms in the deep aquitard samples. However, our sample size is too small  
551 to conclusively explain the recovery of paleome and non-paleome signatures based  
552 on environmental factors or rock characteristics.

553 Endolithic microbiomes from both groups seem to rely on a bottom-up,  
554 chemolithotrophy food web driven by taxa such as *Cand. Rokubacteria*,  
555 Gemmatimonadetes, NC10, Nitrospirae, Thaumarchaeota, and Euryarchaeota.  
556 Remarkably, we found an increased abundance of chemolithoautotrophs in the  
557 paleome signatures coinciding with more detected sequences linked to carbon  
558 fixation, nitrification, and sulfur oxidation.

559 Metagenome assemblies were skewed towards taxa that did assemble well with  
560 consequences for DNA damage patterns. Therefore, we also carried DNA damage  
561 pattern analysis for only *Cand. Rokubacteria* contigs, and could show that these  
562 contigs did feature DNA damage as well, supporting that this taxon was a member of  
563 the paleome community. *Cand. Rokubacteria*, was hypothesized to use nitrite  
564 oxidation to build a proton motive force [94]. *Cand. Rokubacteria* genomes were

565 previously shown to contain early-branching *dsrAB* genes [95]. They possess motility  
566 genes, genes for sensor proteins for diverse stimuli, and genes for respiration  
567 (aerobic and anaerobic), fermentation, nitrogen respiration, and nitrite oxidation  
568 underline metabolic flexibility and the ability to actively move, which might favor  
569 survival in connected rock pore networks.

570 The phylum NC10, including *Cand. Methyloirabilis oxyfera*, is known to couple  
571 anaerobic methane oxidation to nitrite reduction [96]. Nitrospirae and  
572 Thaumarchaeota are both well known for nitrification [97, 98], including  
573 COMAMMOX in case of the former [99]. Nitrospirae are overall poorly characterized  
574 and mostly associated with nitrite oxidation. A candidate genus identified in rice  
575 paddy soil, “*Candidatus Sulfoibium*”, was associated with sulfur respiration [100].  
576 Euryarchaeota include the majority of the known methanogens and the  
577 Methanosarcinales-related ANME (anaerobic methane oxidizing archaea) clades  
578 [101]. However, we cannot make more concrete statements about their specific role  
579 in subsurface habitats.

580 Group (1) data sets showed a broader metabolic potential with respect to  
581 sedimentary organic carbon breakdown in the context of aromatic hydrocarbons. The  
582 use of sedimentary organic matter by pelagic groundwater microbes of the Hainich  
583 CZE was recently shown by DIC isotope pattern analyses [25, 102]. Group (1)  
584 samples also featured increased abundances of Acidobacteria. Ubiquitous in soils,  
585 Acidobacteria are characterized by a versatility relating to the utilization of (complex)  
586 carbohydrates [103] and as K-strategists [104]. Acidobacteria, Bacteroidetes and  
587 *Cand. Saccharibacteria* are known as potential degraders for complex  
588 polysaccharides [103–106]. The latter two were more abundant in group (2)  
589 samples. These taxonomic and metabolic differences suggest a stronger adaptation



590 of the paleome community to the harsh conditions of the endolithic habitat dominated  
591 by inorganic electron donors and CO<sub>2</sub> as carbon source, whereas modern  
592 communities might profit from a more constant supply of biomass rich in proteins and  
593 carbohydrates under water saturated conditions, which could be derived from plants,  
594 but also microbial biomass.

595 Detected endolithic Cyanobacteria, which have been more prevalent in group (1)  
596 samples, could have made use of their fermentative capabilities [107], feeding on  
597 available organic carbon, maybe pre-processed by other community members. A  
598 study targeting the Iberian Pyrite Belt Mars showed that Cyanobacteria were highly  
599 abundant and they seemed to consume hydrogen [15]. Hydrogenotrophy might be a  
600 physiological trait in Cyanobacteria dating back to nonphotosynthetic ancestors  
601 [108]. Using mgDNA, we detected Candidate Phyla Radiation (CPR) taxa in both  
602 groups. We previously hypothesized that CPR taxa are ideally suited to invade and  
603 colonize endolithic environments due to their small cell size [17] and their preference  
604 to be translocated with seepage water from soil into the vadose zone, and finally into  
605 groundwater [109]. This would not apply to episympiotic CPR with tight relationships  
606 with partner organisms. In the paleome, we detected increased abundances of  
607 *Cand. Eisenbacteria*, *Cand. Jorgensenbacteria*, and *Cand. Levybacteria*. *Cand.*  
608 *Eisenbacteria* were recently found [110] to possess a potential for secondary  
609 metabolite biosynthesis. Because of primer bias of the 16S rRNA gene [111], some  
610 CPR may have been missed in many subsurface gene surveys, similar to our  
611 previous study of endolithic bacteria from the Hainich CZE [17].

612

613 **Summary and conclusion**

614 DNA damage patterns can be used as a proxy to distinguish DNA from intact and  
615 potentially alive cells from paleome signatures. Limestone rocks seem to represent  
616 ideal archives for genetic records of past microbial communities, due to their specific  
617 conditions facilitating long-term DNA preservation. Neither the amount of extractable  
618 DNA, nor the status of the endolithic microbiome were indicated by porosity. Water  
619 saturation, but not groundwater flow, might be key for microbial survival, as all  
620 paleome signatures were detected in the shallow vadose zone, whereas DNA  
621 obtained even from deep aquitards, isolated from surface input did not show any  
622 DNA decay. Taxonomic and functional profiling highlighted the importance of  
623 hydrocarbon utilization and chemolithotrophy linked to sulfur cycling, the latter  
624 presumably driven by *Cand. Rokubacteria* in the paleome. Our study shows that  
625 carbonate rocks harbor microbial biomass, but that a large portion of the microbes  
626 detected by metagenomic sequencing are likely echoes of past microbial  
627 communities. Metagenomics and the distinction between “modern” and “ancient”  
628 DNA can pave the way to a deeper understanding of the subsurface  
629 geomicrobiological history and its changes over time.

630

### 631 **Acknowledgements**

632 This work was supported financially by the Deutsche Forschungsgemeinschaft  
633 (DFG, German Research Foundation) under Germany's Excellence Strategy – EXC  
634 2051 – Project-ID 390713860, the Collaborative Research Centre AquaDiva (CRC  
635 1076 AquaDiva - Project-ID 218627073) of the Friedrich Schiller University Jena,  
636 and the Max Planck Society.

637

### 638 **Author contributions**

639 CEW carried out data processing, data analysis, and wrote and revised the  
640 manuscript based on input from all co-authors. RS, supported by ZF, was  
641 responsible for rock sample processing, testing and adapting protocols, DNA  
642 extractions, and sequencing library preparation. IV and AH contributed to sequence  
643 data preprocessing, decontamination analysis, and data interpretation. RL  
644 coordinated the sampling, acquired permits, and characterized sampled rock  
645 material. TR performed  $\mu$ CT analysis. KUT coordinated the sampling, acquired  
646 permits, acquired funding, and contributed to data interpretation. CW conceptualized  
647 the research, contributed to data interpretation, and acquired funding. KK  
648 conceptualized the research, contributed to data interpretation, and acquired  
649 funding.

650

## 651 **References**

- 652 1. Whitman WB, Coleman DC, Wiebe WJ. Prokaryotes: The unseen majority. *Proc Natl Acad Sci U S A*.  
653 1998;95:6578–83.
- 654 2. Bar-On YM, Phillips R, Milo R. The biomass distribution on Earth. *Proc Natl Acad Sci U S A*. 2018;115:6506–  
655 11.
- 656 3. Magnabosco C, Lin L-H, Dong H, Bomberg M, Ghiorse W, Stan-Lotter H, et al. The biomass and biodiversity  
657 of the continental subsurface. *Nat Geosci*. 2018;11:707–17.
- 658 4. Pedersen K. Microbial life in deep granitic rock. *FEMS Microbiol Rev*. 1997;20:399–414.
- 659 5. Zhang G, Dong H, Jiang H, Xu Z, Eberl DD. Unique Microbial Community in Drilling Fluids from Chinese  
660 Continental Scientific Drilling. *Geomicrobiol J*. 2006;23:499–514.
- 661 6. Suzuki S, Ishii S 'ichi, Wu A, Cheung A, Tenney A, Wanger G, et al. Microbial diversity in The Cedars, an  
662 ultrabasic, ultrareducing, and low salinity serpentinizing ecosystem. *Proc Natl Acad Sci U S A*. 2013;110:15336–  
663 41.
- 664 7. Momper L, Kiel Reese B, Zinke L, Wanger G, Osburn MR, Moser D, et al. Major phylum-level differences  
665 between porefluid and host rock bacterial communities in the terrestrial deep subsurface. *Environ Microbiol Rep*.  
666 2017;9:501–11.
- 667 8. Purkamo L, Kietäväinen R, Nuppenen-Puputti M, Bomberg M, Cousins C. Ultradeep Microbial Communities at  
668 4.4 km within Crystalline Bedrock: Implications for Habitability in a Planetary Context. *Life*. 2020;10.
- 669 9. Krumholz LR, McKinley JP, Ulrich GA, Suflita JM. Confined subsurface microbial communities in Cretaceous  
670 rock. *Nature*. 1997;386:64–6.
- 671 10. Fredrickson JK, McKinley JP, Bjornstad BN, Long PE, Ringelberg DB, White DC, et al. Pore-size constraints  
672 on the activity and survival of subsurface bacteria in a late cretaceous shale-sandstone sequence, northwestern  
673 New Mexico. *Geomicrobiol J*. 1997;14:183–202.
- 674 11. Krumholz LR. Microbial communities in the deep subsurface. *Hydrogeol J*. 2000;8:4–10.
- 675 12. Giongo A, Haag T, Medina-Silva R, Heemann R, Pereira LM, Zamberlan PM, et al. Distinct deep subsurface  
676 microbial communities in two sandstone units separated by a mudstone layer. *Geosci J*. 2020;24:267–74.
- 677 13. Zhang G, Dong H, Xu Z, Zhao D, Zhang C. Microbial diversity in ultra-high-pressure rocks and fluids from the  
678 Chinese Continental Scientific Drilling Project in China. *Appl Environ Microbiol*. 2005;71:3213–27.
- 679 14. Dutta A, Dutta Gupta S, Gupta A, Sarkar J, Roy S, Mukherjee A, et al. Exploration of deep terrestrial  
680 subsurface microbiome in Late Cretaceous Deccan traps and underlying Archean basement, India. *Sci Rep*.  
681 2018;8:17459.
- 682 15. Puente-Sánchez F, Arce-Rodríguez A, Oggerin M, García-Villadangos M, Moreno-Paz M, Blanco Y, et al.  
683 Viable cyanobacteria in the deep continental subsurface. *Proc Natl Acad Sci U S A*. 2018;115:10702–7.

- 684 16. Ben Maamar S, Aquilina L, Quaiser A, Pauwels H, Michon-Coudouel S, Vergnaud-Ayraud V, et al.  
685 Groundwater Isolation Governs Chemistry and Microbial Community Structure along Hydrologic Flowpaths. *Front*  
686 *Microbiol.* 2015;6:1457.
- 687 17. Lazar CS, Lehmann R, Rosenberger J, Totsche KU, Küsel K. The endolithic bacterial diversity of  
688 shallow bedrock ecosystems. *Sci Total Environ.* 2019;679:35–44.
- 689 18. Lehmann R, Totsche KU. Multi-directional flow dynamics shape groundwater quality in sloping bedrock  
690 strata. *J Hydrol.* 2020;580:124291.
- 691 19. Walter Anthony KM, Anthony P, Grosse G, Chanton J. Geologic methane seeps along boundaries of Arctic  
692 permafrost thaw and melting glaciers. *Nat Geosci.* 2012;5:419–26.
- 693 20. Jones AA, Bennett PC. Mineral Microniches Control the Diversity of Subsurface Microbial Populations.  
694 *Geomicrobiol J.* 2014;31:246–61.
- 695 21. Kieft TL, Murphy EM, Haldeman DL, Amy PS, Bjornstad BN, McDonald EV, et al. Microbial Transport,  
696 Survival, and Succession in a Sequence of Buried Sediments. *Microb Ecol.* 1998;36:336–48.
- 697 22. Amy PS, Haldeman DL, Ringelberg D, Hall DH, Russell C. Comparison of Identification Systems for  
698 Classification of Bacteria Isolated from Water and Endolithic Habitats within the Deep Subsurface. *Appl Environ*  
699 *Microbiol.* 1992;58:3367–73.
- 700 23. Hoehler TM, Jørgensen BB. Microbial life under extreme energy limitation. *Nat Rev Microbiol.* 2013;11:83–  
701 94.
- 702 24. Schwab VF, Herrmann M, Roth VN, Gleixner G, Lehmann R, Pohnert G, et al. Functional diversity of  
703 microbial communities in pristine aquifers inferred by PLFA- and sequencing-based approaches.  
704 *Biogeosciences.* 2017;14:2697–714.
- 705 25. Nowak ME, Schwab VF, Lazar CS, Behrendt T, Kohlhepp B, Totsche KU, et al. Carbon isotopes of dissolved  
706 inorganic carbon reflect utilization of different carbon sources by microbial communities in two limestone aquifer  
707 assemblages. *Hydrol Earth Syst Sci.* 2017;21:4283–300.
- 708 26. Fredrickson JK, Balkwill DL. Geomicrobial Processes and Biodiversity in the Deep Terrestrial Subsurface.  
709 *Geomicrobiol J.* 2006;23:345–56.
- 710 27. McMahon PB, Chapelle FH. Microbial production of organic acids in aquitard sediments and its role in aquifer  
711 geochemistry. *Nature.* 1991;349:233–5.
- 712 28. Brundin M, Figdor D, Sundqvist G, Sjögren U. DNA binding to hydroxyapatite: a potential mechanism for  
713 preservation of microbial DNA. *J Endod.* 2013;39:211–6.
- 714 29. Del Valle LJ, Bertran O, Chaves G, Revilla-López G, Rivas M, Casas MT, et al. DNA adsorbed on  
715 hydroxyapatite surfaces. *J Mater Chem B Mater Biol Med.* 2014;2:6953–66.
- 716 30. Der Sarkissian C, Pichereau V, Dupont C, Ilsøe PC, Perrigault M, Butler P, et al. Ancient DNA analysis  
717 identifies marine mollusc shells as new metagenomic archives of the past. *Mol Ecol Resour.* 2017;17:835–53.
- 718 31. Sullivan AP, Marciniak S, O'Dea A, Wake TA, Perry GH. Modern, archaeological, and paleontological DNA  
719 analysis of a human-harvested marine gastropod (*Strombus pugilis*) from Caribbean Panama. *Mol Ecol Resour.*  
720 2021;21:1517–28.
- 721 32. Romanowski G, Lorenz MG, Wackernagel W. Adsorption of plasmid DNA to mineral surfaces and protection  
722 against DNase I. *Appl Environ Microbiol.* 1991;57:1057–61.
- 723 33. Wright VP. A revised classification of limestones. *Sediment Geol.* 1992;76:177–85.
- 724 34. Hennissen JAI, Hough E, Vane CH, Leng MJ, Kemp SJ, Stephenson MH. The prospectivity of a potential  
725 shale gas play: An example from the southern Pennine Basin (central England, UK). *Mar Pet Geol.*  
726 2017;86:1047–66.
- 727 35. Ahr WM, Allen D, Boyd A, Bachman HN, Ramamoorthy R. Confronting the carbonate conundrum. *Oilfield*  
728 *Review.* 2005;17:18–29.
- 729 36. Philip W. Choquette (2) Lloyd C. P. Geologic nomenclature and classification of porosity in sedimentary  
730 carbonates. *Am Assoc Pet Geol Bull.* 1970;54.
- 731 37. Buades A, Coll B, Morel J-M. A non-local algorithm for image denoising. In: 2005 IEEE Computer Society  
732 Conference on Computer Vision and Pattern Recognition (CVPR'05). 2005. p. 60–5 vol. 2.
- 733 38. Schindelin J, Arganda-Carreras I, Frise E, Kaynig V, Longair M, Pietzsch T, et al. Fiji: an open-source  
734 platform for biological-image analysis. *Nat Methods.* 2012;9:676–82.
- 735 39. Doube M, Klosowski MM, Arganda-Carreras I, Cordelières FP, Dougherty RP, Jackson JS, et al. BoneJ: Free  
736 and extensible bone image analysis in ImageJ. *Bone.* 2010;47:1076–9.
- 737 40. Muddiman DC, Anderson GA, Hofstadler SA, Smith RD. Length and base composition of PCR-amplified  
738 nucleic acids using mass measurements from electrospray ionization mass spectrometry. *Anal Chem.*  
739 1997;69:1543–9.
- 740 41. Meyer M, Kircher M. Illumina sequencing library preparation for highly multiplexed target capture and  
741 sequencing. *Cold Spring Harb Protoc.* 2010;2010:db.prot5448.
- 742 42. Andrews S. FastQC: a quality control tool for high throughput sequence data. 2010.  
743 <http://www.bioinformatics.babraham.ac.uk/projects/fastqc>.
- 744 43. Bushnell B. BBMap short read aligner. 2016. <https://www.sourceforge.net/projects/bbmap/>.
- 745 44. Menzel P, Ng KL, Krogh A. Fast and sensitive taxonomic classification for metagenomics with Kaiju. *Nat*  
746 *Commun.* 2016;7:1–9.
- 747 45. Buchfink B, Xie C, Huson DH. Fast and sensitive protein alignment using DIAMOND. *Nat Methods.*  
748 2015;12:59–60.
- 749 46. Buchfink B, Reuter K, Drost H-G. Sensitive protein alignments at tree-of-life scale using DIAMOND. *Nat*  
750 *Methods.* 2021;18:366–8.

- 751 47. Rognes T, Flouri T, Nichols B, Quince C, Mahé F. VSEARCH: a versatile open source tool for metagenomics.  
752 PeerJ. 2016;4:e2584–e2584.
- 753 48. M. Burrows DJW. A block-sorting lossless data compression algorithm. Technical report 124 , Palo Alto,  
754 CADigital Equipment Corporation. 1994.
- 755 49. Li H, Durbin R. Fast and accurate short read alignment with Burrows-Wheeler transform. *Bioinformatics*.  
756 2009;25:1754–60.
- 757 50. Huson DH, Auch AF, Qi J, Schuster SC. {MEGAN} analysis of metagenomic data. *Genome Res*.  
758 2007;17:377–86.
- 759 51. Huson DH, Beier S, Flade I, G??rska A, El-Hadidi M, Mitra S, et al. MEGAN Community Edition - Interactive  
760 Exploration and Analysis of Large-Scale Microbiome Sequencing Data. *PLoS Comput Biol*. 2016;12:1–12.
- 761 52. Pruitt KD, Tatusova T, Brown GR, Maglott DR. NCBI Reference Sequences (RefSeq): current status, new  
762 features and genome annotation policy. *Nucleic Acids Res*. 2012;40 Database issue:D130–5.
- 763 53. Davis NM, Proctor DM, Holmes SP, Relman DA, Callahan BJ. Simple statistical identification and removal of  
764 contaminant sequences in marker-gene and metagenomics data. *Microbiome*. 2018;6:226.
- 765 54. Rodriguez-R LM, Konstantinidis KT. Nonpareil: a redundancy-based approach to assess the level of  
766 coverage in metagenomic datasets. *Bioinformatics*. 2014;30:629–35.
- 767 55. Rodriguez-R LM, Gunturu S, Tiedje JM, Cole JR, Konstantinidis KT. Nonpareil 3: Fast Estimation of  
768 Metagenomic Coverage and Sequence Diversity. *mSystems*. 2018;3.
- 769 56. Li D, Liu CM, Luo R, Sadakane K, Lam TW. MEGAHIT: An ultra-fast single-node solution for large and  
770 complex metagenomics assembly via succinct de Bruijn graph. *Bioinformatics*. 2014;31:1674–6.
- 771 57. Bankevich A, Nurk S, Antipov D, Gurevich AA, Dvorkin M, Kulikov AS, et al. SPAdes: A New Genome  
772 Assembly Algorithm and Its Applications to Single-Cell Sequencing. *J Comput Biol*. 2012;19:455–77.
- 773 58. Nurk S, Meleshko D, Pevzner P. {metaSPAdes}: a new versatile de novo metagenomics assembler.  
774 *Quantitative Biology*. 2016.
- 775 59. Langmead B, Salzberg SL. Fast gapped-read alignment with Bowtie 2. *Nat Methods*. 2012;9:357–9.
- 776 60. Li H, Handsaker B, Wysoker A, Fennell T, Ruan J, Homer N, et al. The Sequence Alignment/Map format and  
777 SAMtools. *Bioinformatics*. 2009;25:2078–9.
- 778 61. Murat Eren A, Esen ÖC, Quince C, Vineis JH, Morrison HG, Sogin ML, et al. Anvi'o: an advanced analysis  
779 and visualization platform for 'omics data. *PeerJ*. 2015;3:e1319.
- 780 62. Parks DH, Imelfort M, Skennerton CT, Hugenholtz P, Tyson GW, Parks DH, et al. CheckM: assessing the  
781 quality of microbial genomes recovered from isolates, single cells, and metagenomes. *Genome Res*.  
782 2015;25:1043–55.
- 783 63. Chaumeil P-A, Mussig AJ, Hugenholtz P, Parks DH. GTDB-Tk: a toolkit to classify genomes with the Genome  
784 Taxonomy Database. *Bioinformatics*. 2019. <https://doi.org/10.1093/bioinformatics/btz848>.
- 785 64. Beghini F, McIver LJ, Blanco-Míguez A, Dubois L, Asnicar F, Maharjan S, et al. Integrating taxonomic,  
786 functional, and strain-level profiling of diverse microbial communities with bioBakery 3. *Elife*. 2021;10.
- 787 65. Ginolhac A, Rasmussen M, Gilbert MTP, Willerslev E, Orlando L. mapDamage: testing for damage patterns  
788 in ancient DNA sequences. *Bioinformatics*. 2011;27:2153–5.
- 789 66. Jónsson H, Ginolhac A, Schubert M, Johnson PLF, Orlando L. mapDamage2.0: fast approximate Bayesian  
790 estimates of ancient DNA damage parameters. *Bioinformatics*. 2013;29:1682–4.
- 791 67. Borry M, Hübner A, Rohrlach AB, Warinner C. PyDamage: automated ancient damage identification and  
792 estimation for contigs in ancient DNA de novo assembly. *PeerJ*. 2021;9:e11845.
- 793 68. Garrison E, Marth G. Haplotype-based variant detection from short-read sequencing. *arXiv [q-bio.GN]*. 2012.
- 794 69. Danecek P, Bonfield JK, Liddle J, Marshall J, Ohan V, Pollard MO, et al. Twelve years of SAMtools and  
795 BCFtools. *Gigascience*. 2021;10.
- 796 70. Wala J, Zhang C-Z, Meyerson M, Beroukhim R. VariantBam: filtering and profiling of next-generational  
797 sequencing data using region-specific rules. *Bioinformatics*. 2016;32:2029–31.
- 798 71. Wickham H. ggplot2. *WIREs Comp Stat*. 2011;3:180–5.
- 799 72. Overholt WA, Trumbore S, Xu X, Bornemann TLV, Probst AJ, Krüger M, et al. Rates of primary production in  
800 groundwater rival those in oligotrophic marine systems. *bioRxiv*. 2021;:2021.10.13.464073.
- 801 73. Wegner C-E, Gaspar M, Geesink P, Herrmann M, Marz M, Küsel K. Biogeochemical regimes in shallow  
802 aquifers reflect the metabolic coupling of elements of nitrogen, sulfur and carbon. *Appl Environ Microbiol*. 2018.  
803 <https://doi.org/10.1128/AEM.02346-18>.
- 804 74. Kallmeyer J, Grewe S, Glombitza C, Kite JA. Microbial abundance in lacustrine sediments: a case study from  
805 Lake Van, Turkey. *Int J Earth Sci*. 2015;104:1667–77.
- 806 75. Stevanović Z. Karst waters in potable water supply: a global scale overview. *Environ Earth Sci*. 2019;78:662.
- 807 76. Gleeson T, Befus KM, Jasechko S, Luijendijk E, Cardenas MB. The global volume and distribution of modern  
808 groundwater. *Nat Geosci*. 2015;9:161–7.
- 809 77. Key FM, Posth C, Krause J, Herbig A, Bos KI. Mining Metagenomic Data Sets for Ancient DNA:  
810 Recommended Protocols for Authentication. *Trends Genet*. 2017;33:508–20.
- 811 78. Warinner C, Herbig A, Mann A, Fellows Yates JA, Weiß CL, Burbano HA, et al. A Robust Framework for  
812 Microbial Archaeology. *Annu Rev Genomics Hum Genet*. 2017;18:321–56.
- 813 79. Briggs AW, Stenzel U, Johnson PLF, Green RE, Kelso J, Prüfer K, et al. Patterns of damage in genomic DNA  
814 sequences from a Neandertal. *Proc Natl Acad Sci U S A*. 2007;104:14616–21.
- 815 80. Orlando L, Allaby R, Skoglund P, Sarkissian CD, Stockhammer PW, Ávila-Arcos MC, et al. Ancient DNA  
816 analysis. *Nature Reviews Methods Primers*. 2021;1:1–26.
- 817 81. Ogram A, Saylor GS, Gustin D, Lewis RJ. DNA adsorption to soils and sediments. *Environ Sci Technol*.

- 818 1988;22:982–4.
- 819 82. Nielsen KM, Johnsen PJ, Bensasson D, Daffonchio D. Release and persistence of extracellular DNA in the  
820 environment. *Environ Biosafety Res.* 2007;6:37–53.
- 821 83. Pietramellara G, Ascher J, Borgogni F, Ceccherini MT, Guerri G, Nannipieri P. Extracellular DNA in soil and  
822 sediment: Fate and ecological relevance. *Biol Fertil Soils.* 2009;45:219–35.
- 823 84. Inagaki F, Okada H, Tsapin AI, Nealson KH. Microbial survival: the paleome: a sedimentary genetic record of  
824 past microbial communities. *Astrobiology.* 2005;5:141–53.
- 825 85. Küsel K, Totsche KU, Trumbore SE, Lehmann R, Herrmann M, Steinhäuser C, et al. How deep can surface  
826 signals be traced in the critical zone? Merging biodiversity with biogeochemistry research in a central German  
827 Muschelkalk landscape. *Front Earth Sci Chin.* 2016;4 April:1–18.
- 828 86. Linderholm A. Palaeogenetics: Dirt, what is it good for? *Everything.* *Current biology: CB.* 2021;31:R993–5.
- 829 87. Edwards ME. The maturing relationship between Quaternary paleoecology and ancient sedimentary DNA.  
830 *Quat Res.* 2020;96:39–47.
- 831 88. Massilani D, Morley MW, Mentzer SM, Aldeias V, Vernot B, Miller C, et al. Microstratigraphic preservation of  
832 ancient faunal and hominin DNA in Pleistocene cave sediments. *Proc Natl Acad Sci U S A.* 2022;119.
- 833 89. Vernot B, Zavala EI, Gómez-Olivencia A, Jacobs Z, Slon V, Mafessoni F, et al. Unearthing Neanderthal  
834 population history using nuclear and mitochondrial DNA from cave sediments. *Science.* 2021;372.
- 835 90. Zavala EI, Jacobs Z, Vernot B, Shunkov MV, Kozlikin MB, Derevianko AP, et al. Pleistocene sediment DNA  
836 reveals hominin and faunal turnovers at Denisova Cave. *Nature.* 2021;595:399–403.
- 837 91. van der Valk T, Pečnerová P, Díez-Del-Molino D, Bergström A, Oppenheimer J, Hartmann S, et al. Million-  
838 year-old DNA sheds light on the genomic history of mammoths. *Nature.* 2021;591:265–9.
- 839 92. Kozur HW, Bachmann GH. Correlation of the Germanic Triassic with the international scale. *Albertiana.*  
840 2005;32:21–35.
- 841 93. Drake H, Roberts NMW, Reinhardt M, Whitehouse M, Ivarsson M, Karlsson A, et al. Biosignatures of ancient  
842 microbial life are present across the igneous crust of the Fennoscandian shield. *Communications Earth &*  
843 *Environment.* 2021;2:1–13.
- 844 94. Becraft ED, Woyke T, Jarett J, Ivanova N, Godoy-Vitorino F, Poulton N, et al. Rokubacteria: Genomic giants  
845 among the uncultured bacterial phyla. *Front Microbiol.* 2017;8 NOV:1–12.
- 846 95. Anantharaman K, Hausmann B, Jungbluth SP, Kantor RS, Lavy A, Warren LA, et al. Expanded diversity of  
847 microbial groups that shape the dissimilatory sulfur cycle. *ISME J.* 2018;12:1715–28.
- 848 96. Haroon MF, Hu S, Shi Y, Imelfort M, Keller J, Hugenholtz P, et al. Anaerobic oxidation of methane coupled to  
849 nitrate reduction in a novel archaeal lineage. *Nature.* 2013;500:567–70.
- 850 97. Pester M, Schleper C, Wagner M. The Thaumarchaeota: an emerging view of their phylogeny and  
851 ecophysiology. *Curr Opin Microbiol.* 2011;14:300–6.
- 852 98. Offre P, Spang A, Schleper C. Archaea in biogeochemical cycles. *Annu Rev Microbiol.* 2013;67:437–57.
- 853 99. Koch H, van Kessel MAHJ, Lüscher S. Complete nitrification: insights into the ecophysiology of comammox  
854 *Nitrospira.* *Appl Microbiol Biotechnol.* 2018. <https://doi.org/10.1007/s00253-018-9486-3>.
- 855 100. Zecchin S, Mueller RC, Seifert J, Stingl U, Anantharaman K, von Bergen M, et al. Rice Paddy Nitrospirae  
856 Carry and Express Genes Related to Sulfate Respiration: Proposal of the New Genus “Candidatus Sulfoibium.”  
857 *Appl Environ Microbiol.* 2018;84.
- 858 101. Knittel K, Boetius A. Anaerobic oxidation of methane: progress with an unknown process. *Annu Rev*  
859 *Microbiol.* 2009;63:311–34.
- 860 102. Schwab VF, Nowak ME, Elder CD, Trumbore SE, Xu X, Gleixner G, et al. 14C-Free Carbon Is a Major  
861 Contributor to Cellular Biomass in Geochemically Distinct Groundwater of Shallow Sedimentary Bedrock  
862 Aquifers. *Water Resour Res.* 2019;55:2104–21.
- 863 103. Eichorst SA, Trojan D, Roux S, Herbold C, Rattei T, Woebken D. Genomic insights into the Acidobacteria  
864 reveal strategies for their success in terrestrial environments. *Environ Microbiol.* 2018;20:1041–63.
- 865 104. Kielak AM, Barreto CC, Kowalchuk GA, van Veen JA, Kuramae EE. The Ecology of Acidobacteria: Moving  
866 beyond Genes and Genomes. *Front Microbiol.* 2016;7 May:1–16.
- 867 105. Grondin JM, Tamura K, Déjean G, Abbott DW, Brumer H. Polysaccharide Utilization Loci: Fuelling microbial  
868 communities. *J Bacteriol.* 2017;199 January:JB.00860–16.
- 869 106. Kindaichi T, Yamaoka S, Uehara R, Ozaki N, Ohashi A, Albertsen M, et al. Phylogenetic diversity and  
870 ecophysiology of Candidate phylum Saccharibacteria in activated sludge. *FEMS Microbiol Ecol.* 2016;92:fiw078.
- 871 107. Stal LJ, Moezelaar R. Fermentation in cyanobacteria1Publication 2274 of the Centre of Estuarine and  
872 Coastal Ecology, Yerseke, The Netherlands.1. *FEMS Microbiol Rev.* 1997;21:179–211.
- 873 108. Mulikjanian AY, Koonin EV, Makarova KS, Mekhedov SL, Sorokin A, Wolf YI, et al. The cyanobacterial  
874 genome core and the origin of photosynthesis. *Proc Natl Acad Sci U S A.* 2006;103:13126–31.
- 875 109. Herrmann M, Wegner C-E, Taubert M, Geesink P, Lehmann K, Yan L, et al. Predominance of Cand.  
876 *Patescibacteria* in Groundwater Is Caused by Their Preferential Mobilization From Soils and Flourishing Under  
877 Oligotrophic Conditions. *Front Microbiol.* 2019;10:1407.
- 878 110. Sharrar AM, Crits-Christoph A, Méheust R, Diamond S, Starr EP, Banfield JF. Bacterial Secondary  
879 Metabolite Biosynthetic Potential in Soil Varies with Phylum, Depth, and Vegetation Type. *MBio.* 2020;11.
- 880 111. Brown CT, Hug LA, Thomas BC, Sharon I, Castelle CJ, Singh A, et al. Unusual biology across a group  
881 comprising more than 15% of domain Bacteria. *Nature.* 2015;523:208–11.
- 882 112. Choquette PW, Pray LC. Geologic Nomenclature and Classification of Porosity in Sedimentary Carbonates.  
883 *AAPG Bull.* 1970;54:207–50.

884

885 **Figure captions**

886

887 **Figure 1.** Pore space characteristics of samples H13-17 (A-D) and H22-8 (E-G) by  $\mu$ CT  
888 analysis. Moldic pores (up to large mesopores) dominate the packstone. Scale: 0.5 mm.  
889 Plug diameter 13 mm (A). Vertical section shows considerable porosity. The dashed line  
890 marks the position of C (B). Horizontal section (C). Reconstructed pore space. Colors mark  
891 parts of the pore system that are each connected by throats  $>26 \mu\text{m}$  (D). The plug comprises  
892 delithified siliceous marlstone (lower part) and delithified calcareous mudstone (upper part).  
893 Scale: 0.5 mm. Plug diameter 13 mm (E). Vertical section shows thin fractures (micropores).  
894 The dashed line marks the position of G (F). Horizontal section showing fine fractures and  
895 rare micro- to small mesopores. The matrix exhibits no pores connected by throats  $>26 \mu\text{m}$   
896 (G).

897

898 **Figure 2.** Overview of data (pre-)processing. Samples were quantified by fluorometry and  
899 quantitative PCR after DNA extraction (upper panel) and library preparation (lower panel)  
900 (A). Sequence length histograms were generated after quality control and trimming based on  
901 subsampled ( $n = 1 \text{ M}$  read pairs) data sets. The grey shading highlights three data sets for  
902 which the read length distribution was skewed to the left. Based on taxonomic profiling (see  
903 main text) we summarized these three data sets in two groups: (1) and (2) (B). The  
904 proportion of quality controlled and trimmed sequences that could be assigned taxonomically  
905 was determined based on database queries with *diamond* against NCBI nr.

906

907 **Figure 3.** Taxonomic profiling of rock endolithic microbial communities. Principle component  
908 analyses were carried out based on phylum-level (A) and family-level (B) taxonomic profiles,  
909 prior to (left) and after (right) decontamination. The color coding indicates the sample type.  
910 Phylum-level taxonomic profiles were visualized as heatmap (C). (1) and (2) indicate two  
911 groups of samples (see main text for details). White and black boxes indicate if the

912 corresponding profile is based on decontaminated data. Ex. and Lib. BLANKS refer to  
913 extraction and library blanks, respectively.

914

915 **Figure 4.** DNA damage pattern analysis. Quality-controlled sequence reads were mapped  
916 onto assembled contigs (> 1 kbp). The damage pattern analysis was carried out with  
917 *mapdamage* (v.2.2.1) [67]. The plots show the substitution frequency (5pCtoT, 3pGtoA)  
918 versus the relative position (from the 5p and 3p end). n = number of contigs > 1kbp  
919 considered for the analysis, cov = mean coverage of the contigs.

920

921 **Figure 5.** Functional profiling of rock endolithic microbial communities. Profiles were  
922 generated based on output from *humann* regrouped into KEGG orthologies. KEGG  
923 orthologies were summarized based on pathways and selected functions as described in the  
924 methods. Unmapped indicates the proportion of sequences that did not yield any hits against  
925 the pre-compiled UniRef databases shipped with *humann*. logCoPM = log copies per million.

926

## 927 **Table captions**

928 **Table 1.** Origin and contextual data with respect to processed rock samples. Pandora DB  
929 refers to the internal sample database of the MPI SHH/MPI EVA. 1 = Dunham limestone  
930 classification after Wright (1992) [33] and mudrock classification (after Hennissen et al.  
931 2017 [34], modified), 2 = (Visible) Carbonate porosity class after Ahr et al. (2005) [35]:  
932 apparent genetic factors: S (depositional; i: interparticle), D (diagenetic; d: dissolution; p:  
933 replacement; r: reduced; e: enhanced), F (fracture), 3 = Pore size classes after Choquette and  
934 Pray (1970) [112]: mc (micropores, <1/16 mm, macroscopically invisible), sms (small  
935 mesopores, 1/16-1/2 mm), lms (large mesopores, 1/2-4 mm), smg (small megapores, 4-32  
936 mm), 4 = based on  $\mu$ CT analysis, pwd = refers to rock powder samples, pc = refers to rock  
937 pieces samples.



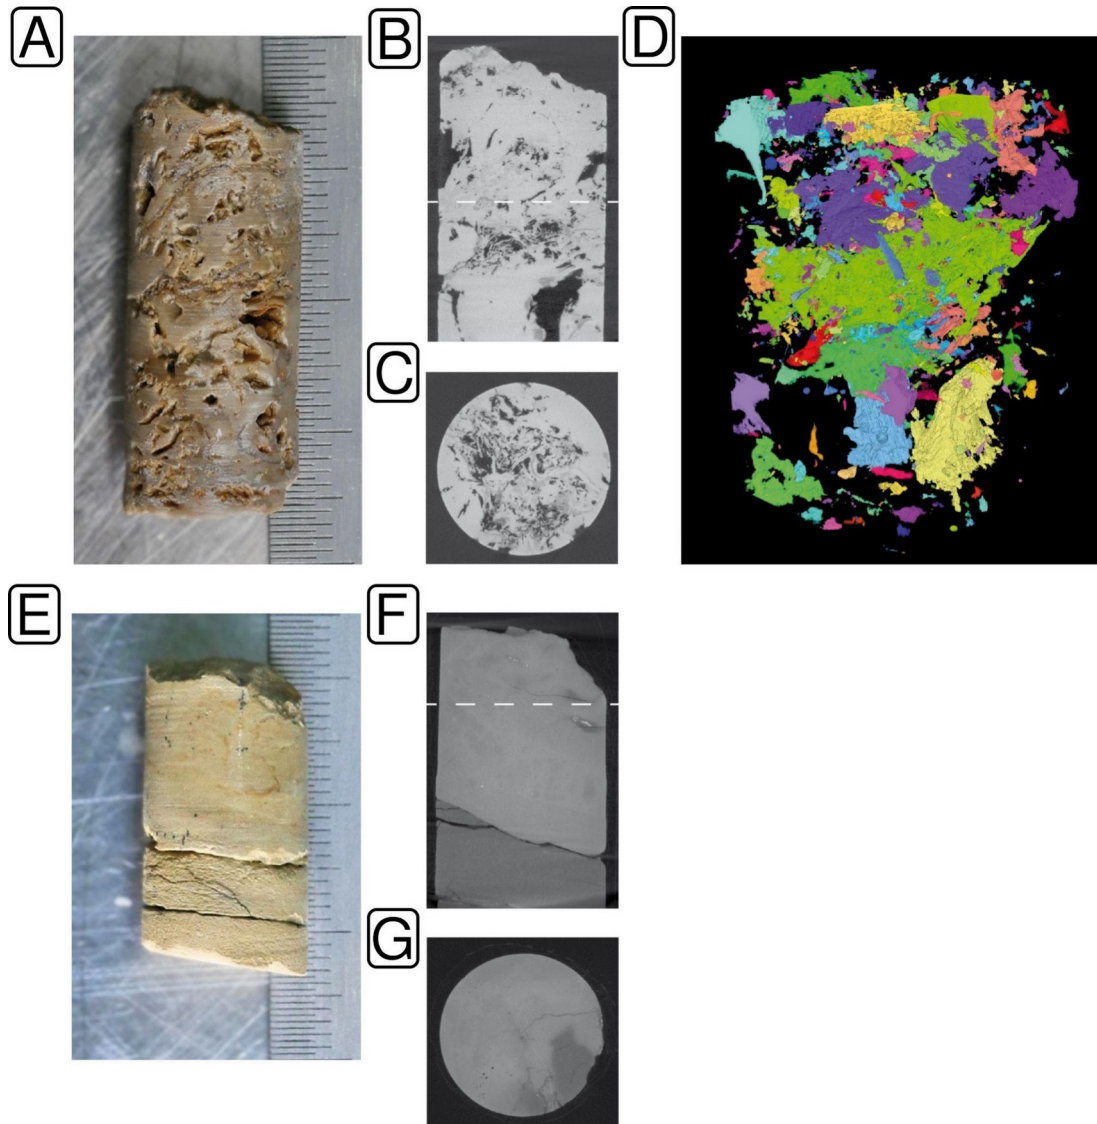

938

939

Figure 1.

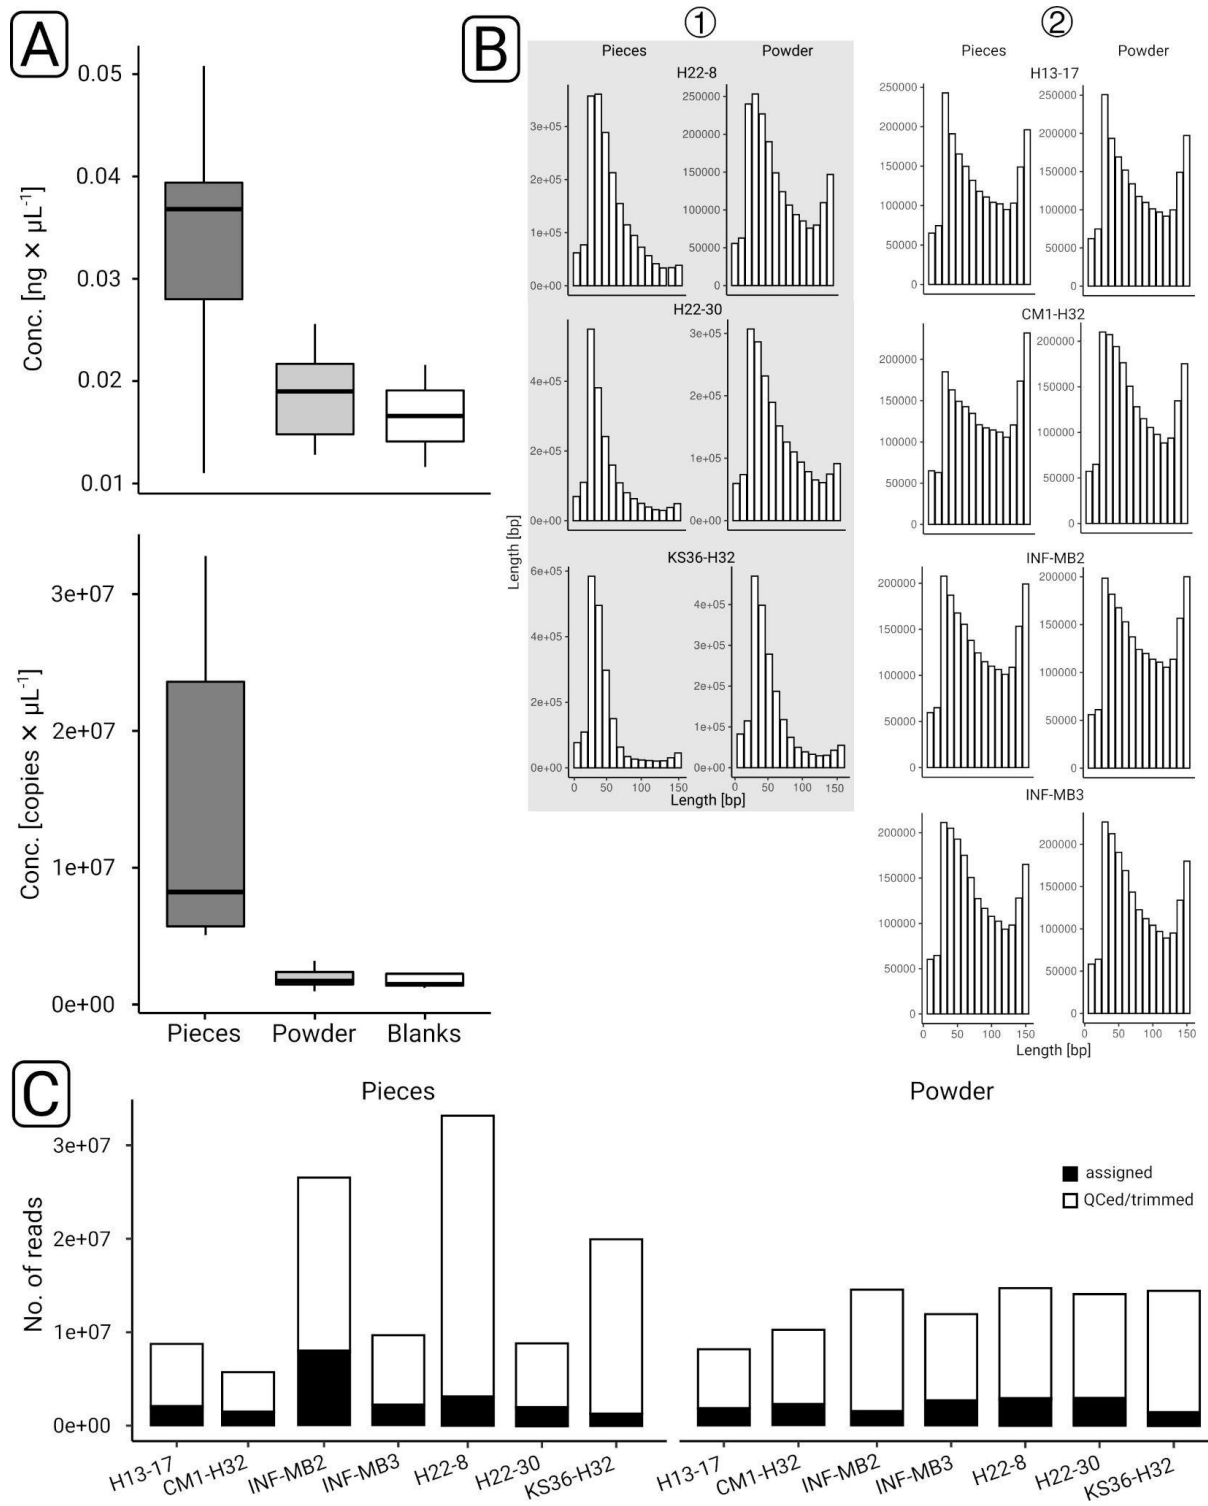

Figure 2

940  
941  
942  
943  
944  
945  
946  
947  
948

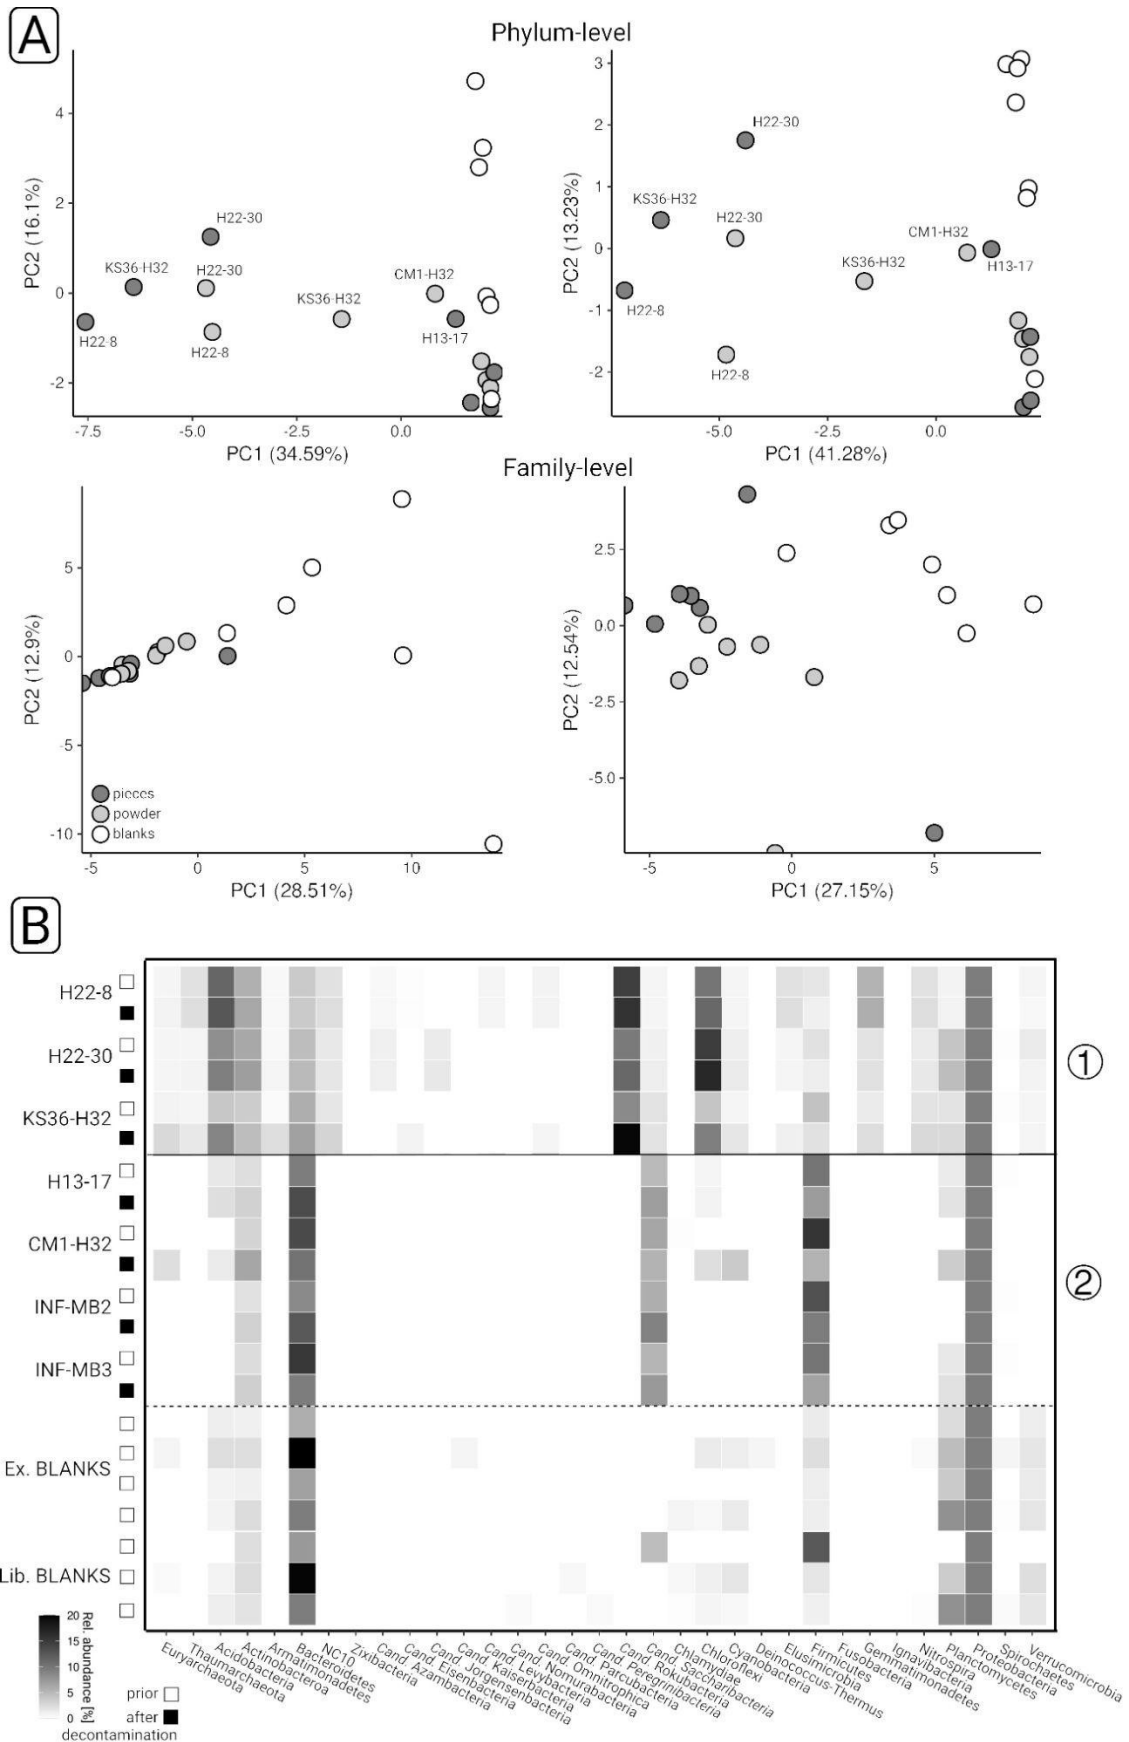

949  
950

Figure 3

951

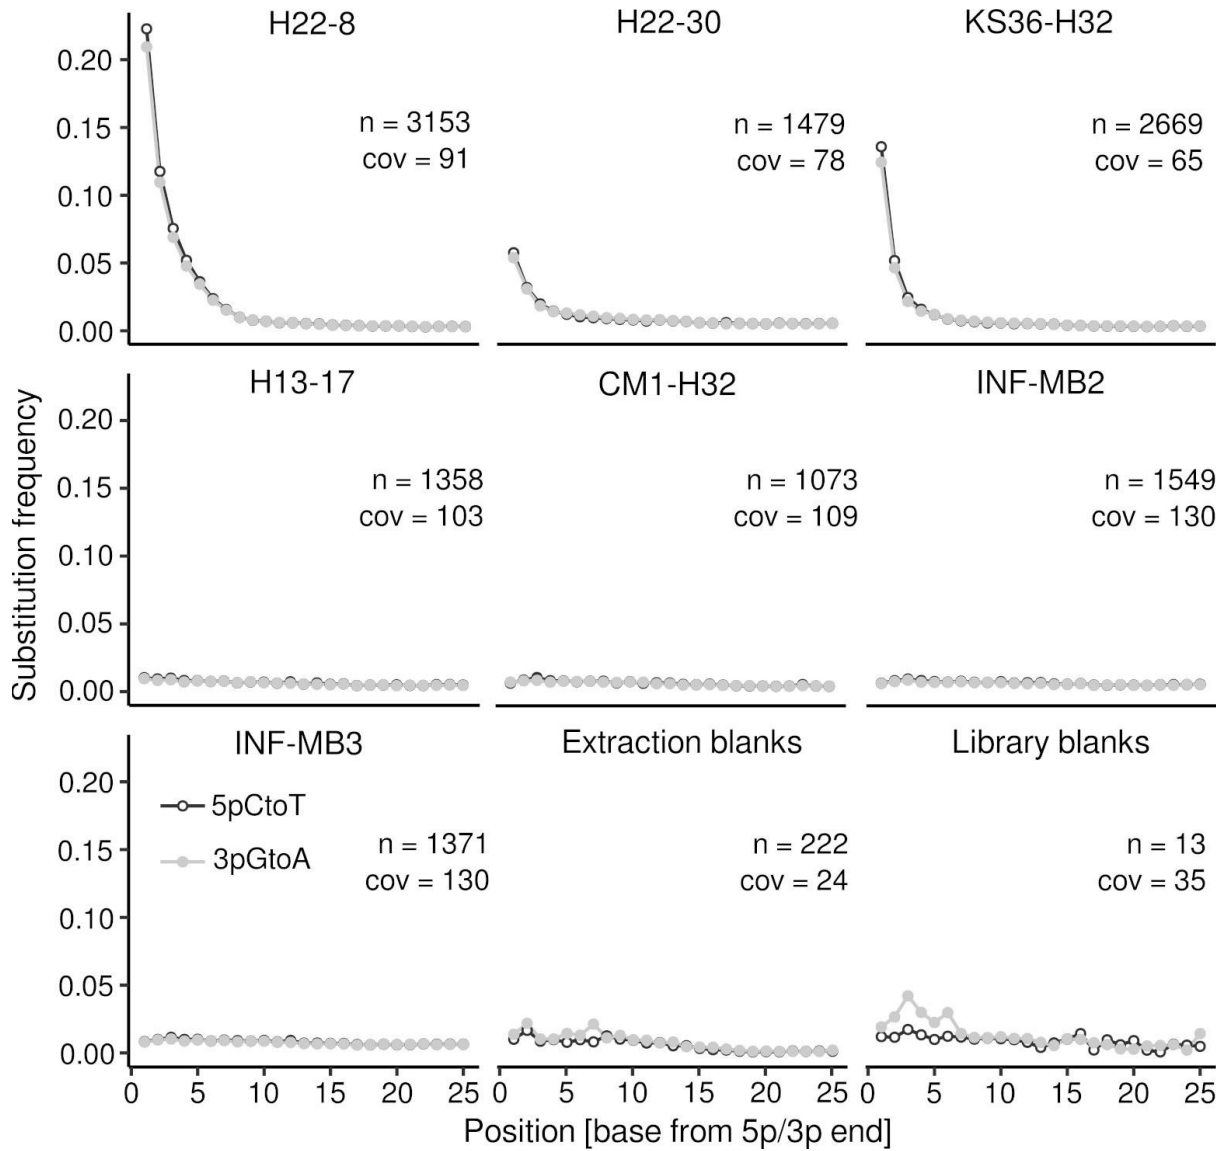

952  
953

Figure 4

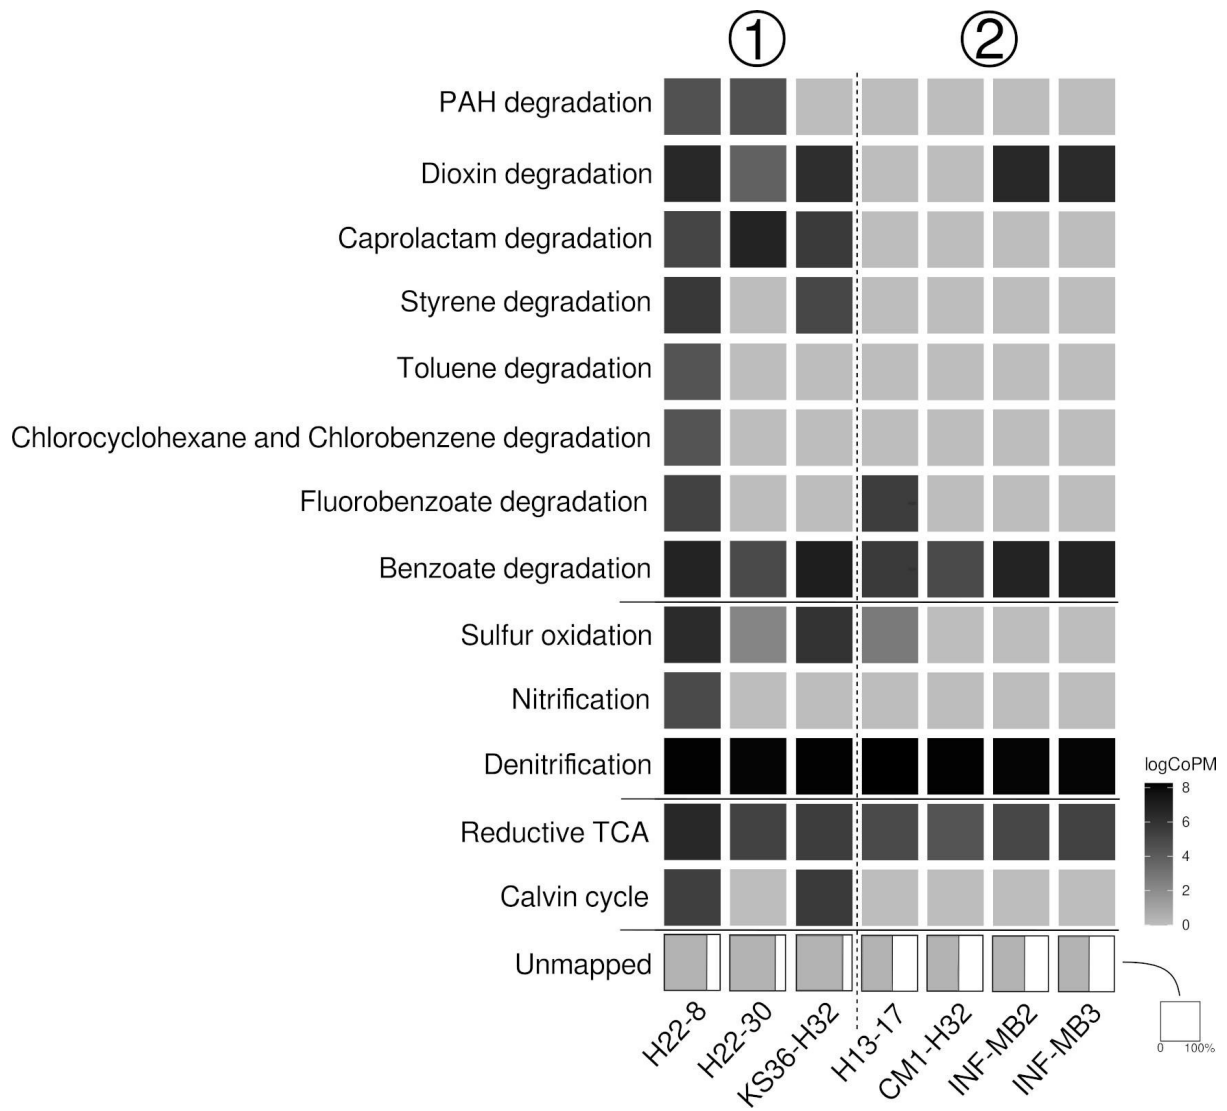

Figure 5

954  
955

Table 1

| Sample ID | Pandora DB ID                                   | Sampling depth (mbsf) | Aquifer type       | Water saturation (in situ) | Rock type <sup>1</sup> , genetic porosity <sup>2</sup> , pore size classes <sup>3</sup>                 | Milieu indicators (plug, Munsell colors)            | Oxicity          | Porosity (%) | Total carbon (%)                 | Organic carbon (%)               | Estimated cell concentration (g <sup>-1</sup> ) |
|-----------|-------------------------------------------------|-----------------------|--------------------|----------------------------|---------------------------------------------------------------------------------------------------------|-----------------------------------------------------|------------------|--------------|----------------------------------|----------------------------------|-------------------------------------------------|
| H13-17    | SET004.B01<br>03 (pwd)<br>SET004.B02<br>03 (pc) | 14.34-14.48           | fracture/<br>karst | saturated                  | Limestone (packstone); D (e); mc, sms-lms                                                               | matrix: 2.5Y 6/2;<br>secondary Fe-minerals in pores | oxic             | 8.9          | 12.00±0.02                       | 2.95 ± 0.69                      | 3.62E+05                                        |
| H22-8     | SET005.A01<br>03 (pwd)<br>SET005.A02<br>03 (pc) | 13.61-13.70           | fracture           | unsaturated                | A: Delithified argillaceous marlstone; F, D (e); mc<br>B: Delithified calcareous mudstone; F, D (e); mc | A, matrix: 2.5Y 7/4; B, matrix: 2.5Y 7/2            | oxic to suboxic  | n.a.         | A: 5.52 ± 0.18<br>B: 8.60 ± 0.10 | A: 1.42 ± 0.47<br>B: 2.12 ± 0.26 | 4.25E+05                                        |
| H22-30    | SET004.A01<br>03 (pwd)<br>SET004.A02<br>03 (pc) | 32.55-32.80           | fracture           | unsaturated                | Limestone (oolithic packstone); D (e), F; mc, sms-lms                                                   | matrix: 2.5Y 6/2;<br>secondary Fe-minerals in pores | oxic             | 2.4          | 11.92 ± 0.08                     | 0.73 ± 0.09                      | 2.38E+05                                        |
| KS36-H32  | SET001.B01<br>04 (pwd)<br>SET001.B02<br>03 (pc) | 8.92-9.06             | fracture           | unsaturated                | Limestone (packstone); D (e); mc, sms-lms                                                               | matrix: 5Y 5/1;<br>secondary Fe-minerals in pores   | oxic             | n.a.         | 12.39 ± 0.17                     | 0.59 ± 0.14                      | 3.52E+05                                        |
| CM1-H32   | SET003.A01<br>03 (pwd)<br>SET003.A02<br>03 (pc) | 21.9-22.0             | fracture           | saturated                  | Calcareous mudstone to limestone (wackestone); D (r); mc                                                | matrix: 10Y 3.5/1                                   | oxygen-deficient | n.a.         | 10.74 ± 0.05                     | 8.17 ± 1.49                      | 4.12E+05                                        |
| INF-MB2   | SET001.A01<br>03 (pwd)<br>SET001.A02<br>03 (pc) | 285.44-<br>285.62     | aquitard           | saturated                  | Calcareous mudstone; D (r); mc                                                                          | matrix: 5GY 2.5/1                                   | anoxic           | n.a.         | 8.61 ± 0.09                      | 2.93 ± 0.07                      | 2.94E+05                                        |
| INF-MB3   | SET002.A01<br>03 (pwd)<br>SET002.A02<br>03 (pc) | 295.71-<br>295.87     | aquitard           | saturated                  | Limestone (packstone to grainstone); D (r); mc                                                          | matrix: 5Y 6/1;<br>bioclasts: N3                    | anoxic           | 0.9          | 12.28±0.01                       | 0.86±0.01                        | 2.94E+05                                        |

958 **Supplementary Figures**

959

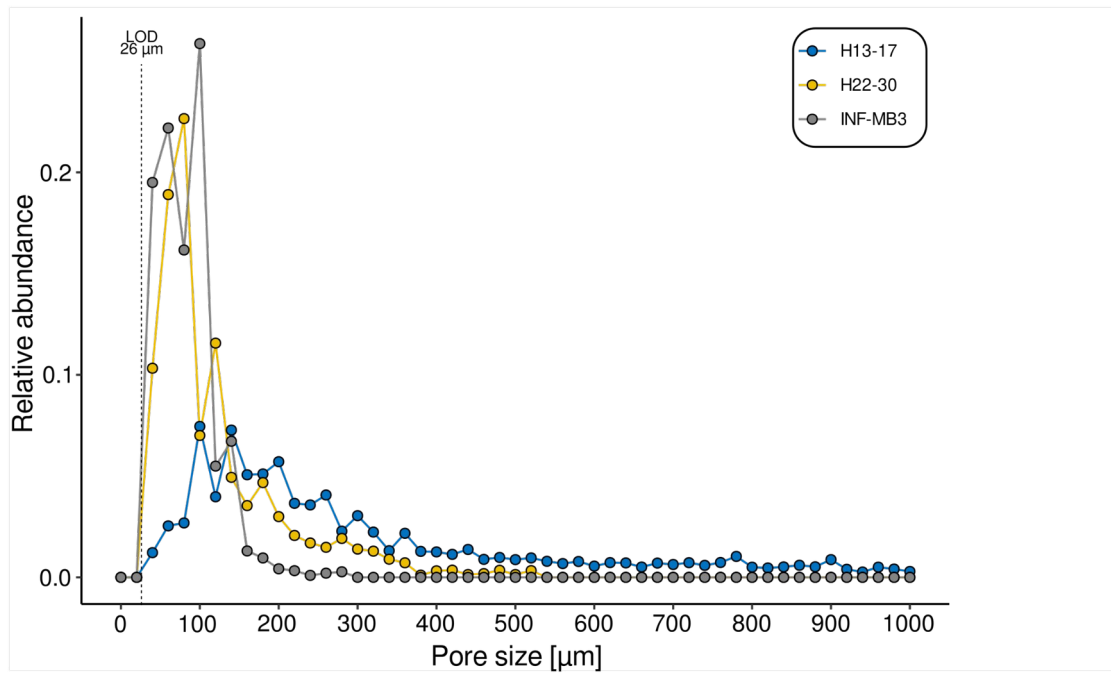

960

961

**Figure S1**

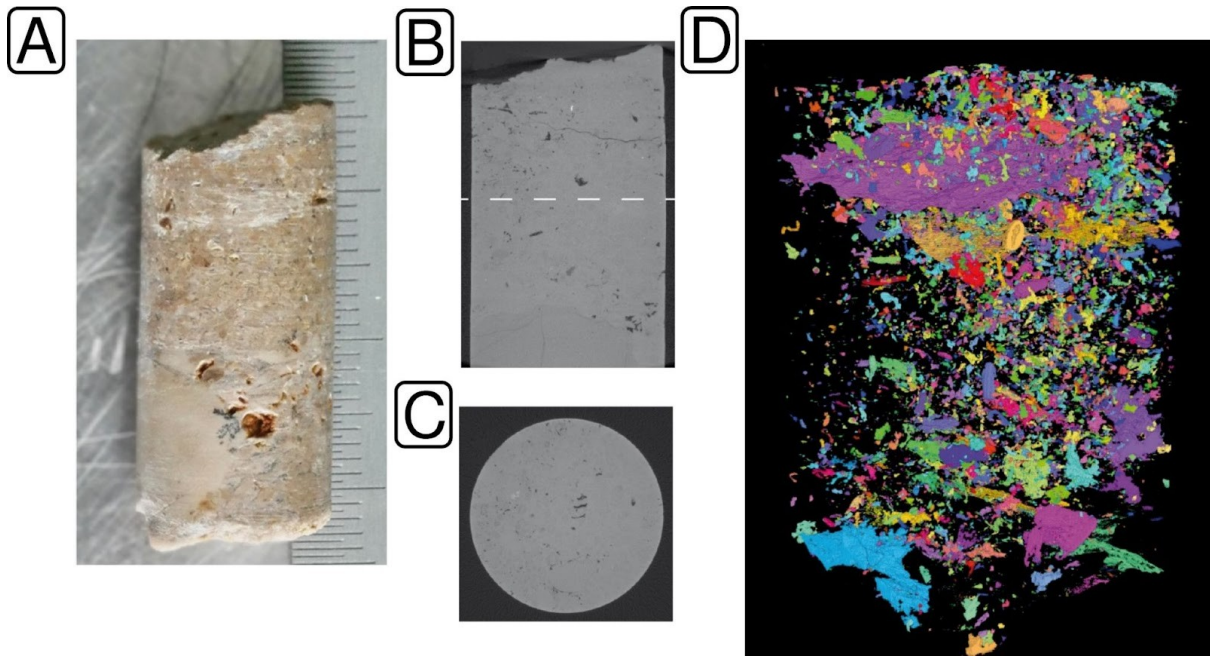

962  
963  
964

Figure S2



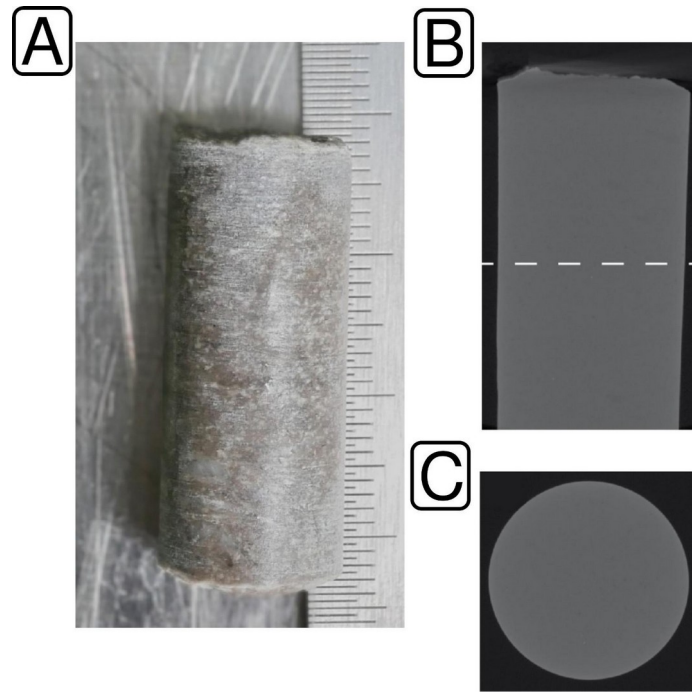

965  
966

**Figure S3**

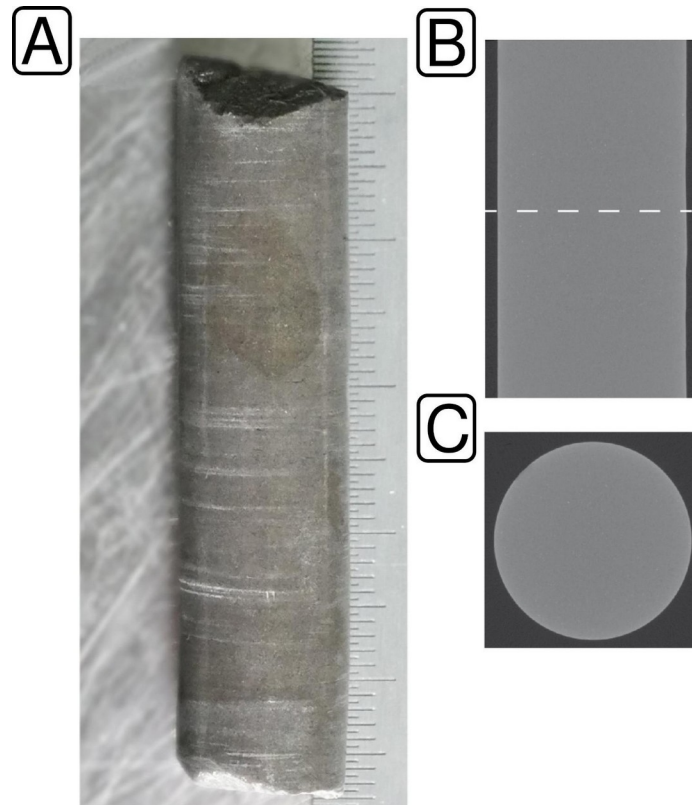

Figure S4

967  
968

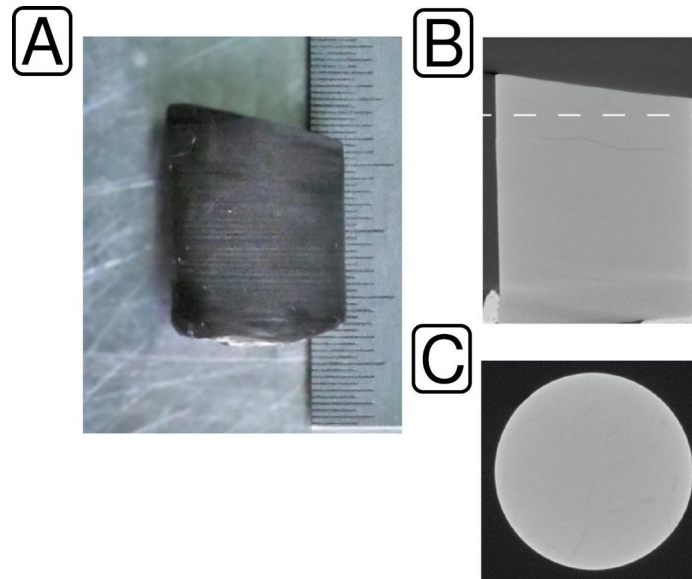

969  
970

Figure S5

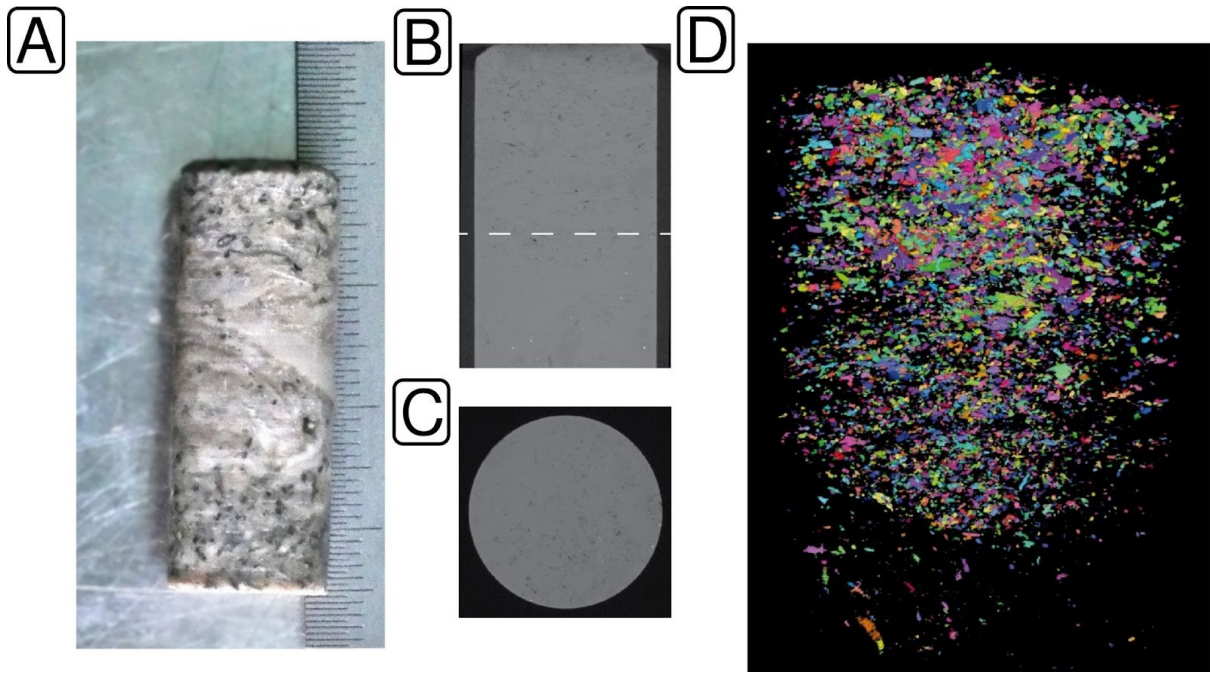

971  
972  
973

Figure S6

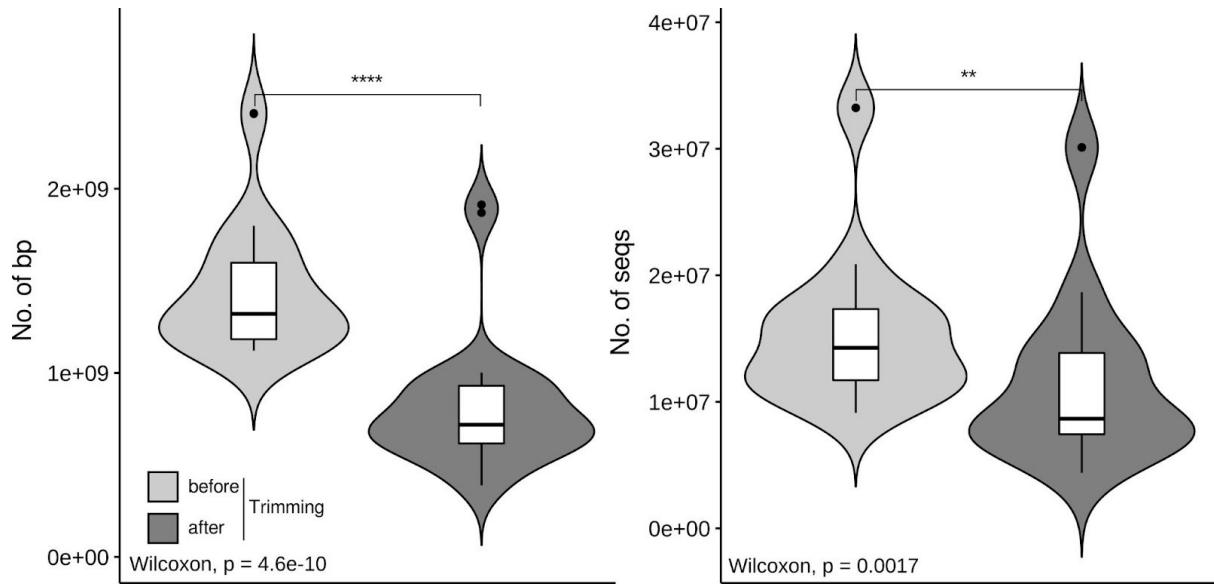

974  
975  
976

**Figure S7**

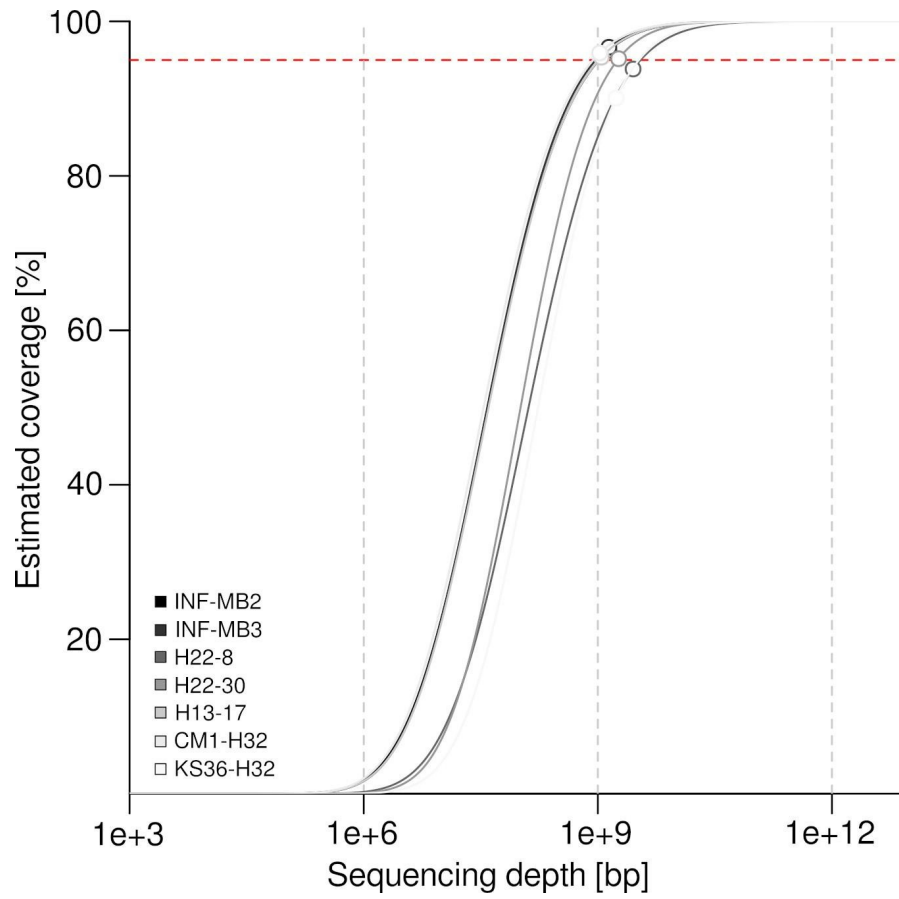

Figure S8

977  
978

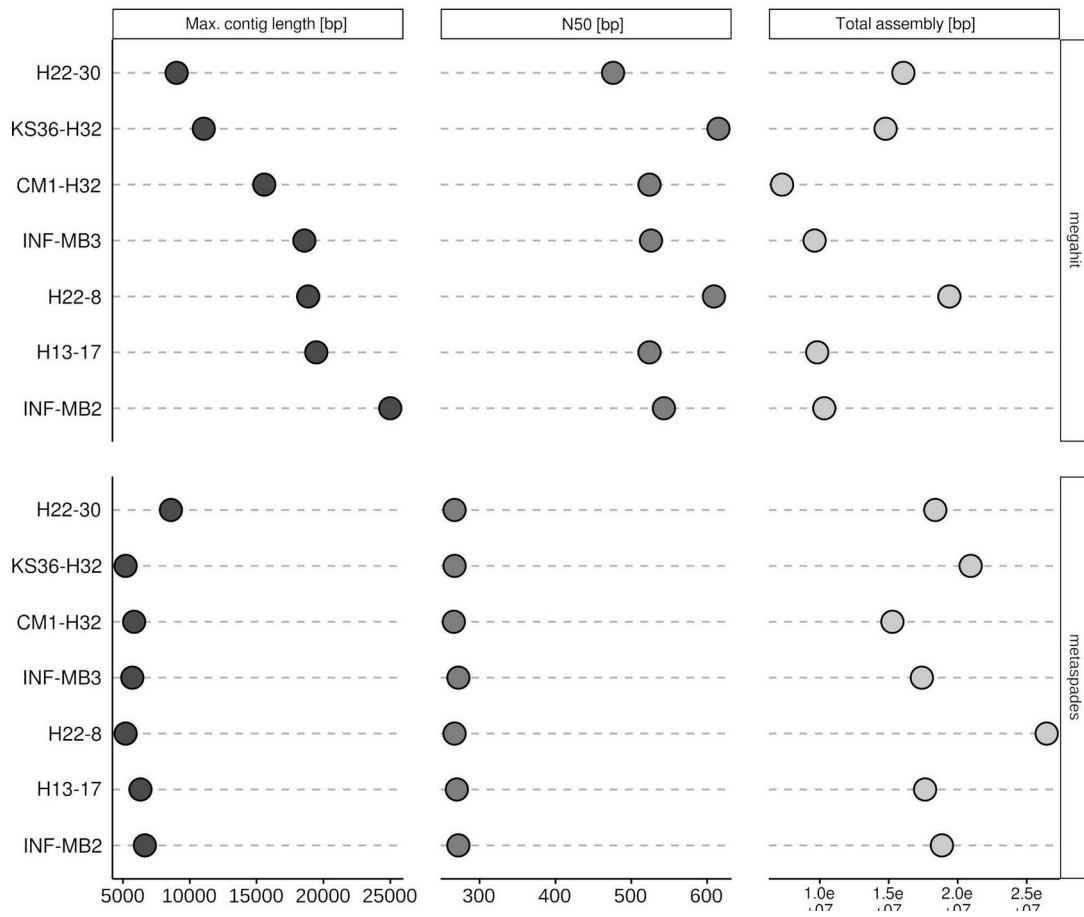

Figure S9

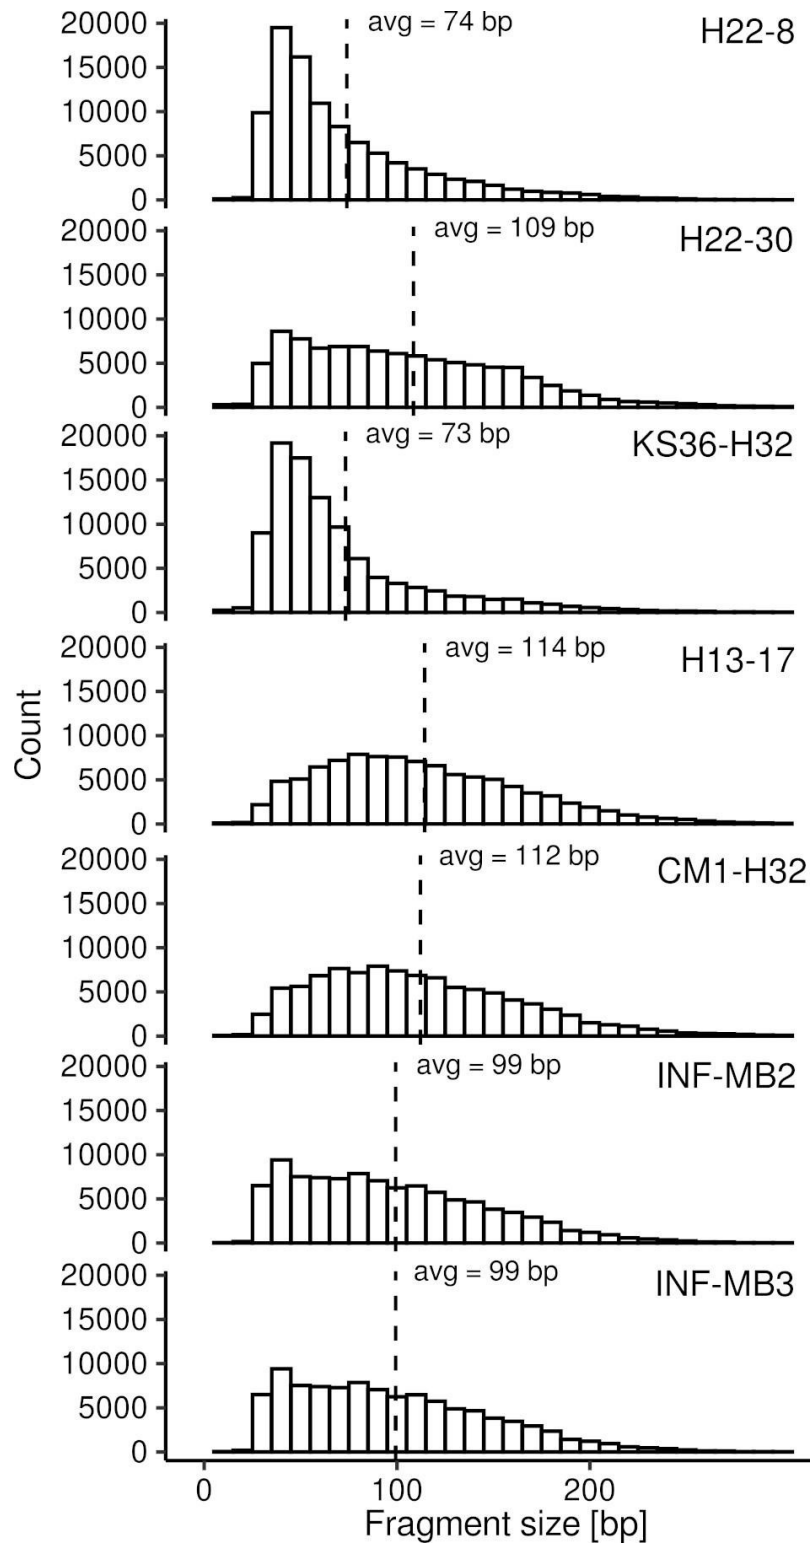

Figure S10

981  
982  
983



984

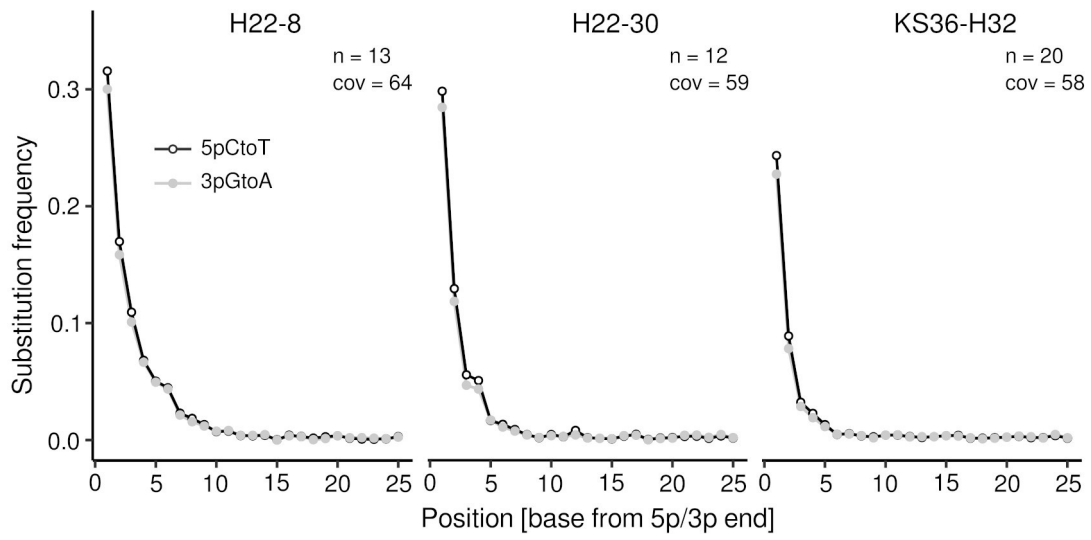

985

986

**Figure S11**
